# Supplementary material for: A multiplexed, confinable CRISPR/Cas9 gene drive can propagate in caged Aedes aegypti populations
Source: PubMed Central journal article supplement (PMC10810878; doi:10.1038/s41467-024-44956-2), 2024-01-25
Supplement: 41467_2024_44956_MOESM1_ESM.pdf [file 41467_2024_44956_MOESM1_ESM.pdf]

## Supplementary Information for

### **A multiplexed, confinable CRISPR/Cas9 gene drive can propagate in caged *Aedes aegypti* populations**

Michelle A.E. Anderson, Estela Gonzalez, Matthew P. Edgington, Joshua X. D. Ang, Deepak-Kumar Purusothaman, Lewis Shackleford, Katherine Nevard, Sebald A. N. Verkuil, Timothy Harvey-Samuel, Philip T. Leftwich, Kevin Esvelt, Luke Alphey

Email: [luke.alphey@york.ac.uk](mailto:luke.alphey@york.ac.uk)

#### **This PDF file includes:**

Supplementary text S1 and S2  
Figures S1 to S10  
Tables S1 to S12  
Legend for Dataset S1

#### **Other supplementary materials for this manuscript include the following:**

Dataset S1 Cage trial

**Supplementary Text S1. Flanking sequences for *bgn-Cas9* line.** Flanking PCRs were performed on the *bgn-Cas9* transgenic line by digesting the gDNA extracted from 10 individuals with the restriction enzymes BamHI, MspI and NcoI (New England Biolabs). Sequencing of the fragments flanking the *piggyBac* sites was performed from purified the PCR products. Primers used: LA182, LA184, LA186 and LA187 (see Table S11). BLAST search was performed to find potential insertion site in the genome.

### ***bgn-Cas9* line D**

BamHI

```
TTAAAGGAAATTTATACATTTTCATTATGCTGAAGGAATGGAGAGAGATGCTTGTAGATCTATGTAT
TCAAGTAAATATTTTATAATAGCGTTGATGTGTGGTATTTTTGGGGCCAAGATAGCCGTAGCGG
TAAACGCGCAGCTATTCAGCAAGAAAAAGCTGAGGGTCGTGGGTTTGAATCCCACCGGCCGAG
GATATTTTCGGATTGGAAATTTTCTCGACTTCCCAGGGCATAAAGTATCATCGTACCTGCCACTC
GATATAAATGGTCATTGCTGGCATAGTAAGCTCTCAGTTAATAACTATGGAAGTGCTCATAAGAA
CACTTGAGTTGAGAAGCAAGCTCTATCCCAGTGGGGACGTAACGCCAGAAAGAAGAGAAAGAA
GAAGTGTGGTATTTTGGACCTAAACTTATCACAATGAGCCGAAATTTGTGAGACGAATCTGAATA
CTGATTGCGACAGAAATGAGAACGATACGAATAATTAAGAATACGGCAAGATGCAATTTTCATTGC
ATTATTTCCAGAAAGACGATCAAGATTTATCAAAGTATTATTGTACAATGCGAAAGCTGTTTTGGG
AAAGAATTTTTTGGCATCGGTTTGTATCAGCATCATTCACTGCAGTAATGGGAAAATTGCAGGTT
TTCAGTATCAATGCTTAATACGATGGATACTAGCACATCACCTACTCCACAACATTTGCACGC
ATTTCAATATAACACACAGAATTCCCACGTATTGCCACTGAAAGCCCAAGATTCTCACAGGATTC
CTAGGATTTCCATTTAACCATTTCCCAGTGAATGCCAGAATCCTCACCATATACCAGAATATCAGTA
TGCACATTTATTTGAATTCCGGGATCCACCGCCCTCCGCACCACGCCCT
```

Length=893

Score E

AaegL5\_1 |  
AaegL5\_2 |  
AaegL5\_3 |

Sequence found repetitive along *Ae. aegypti* genome

MspI

```
AGCGTGAAGACGACAGAAAGGGCGTGGTGC GGAGGGCGGGGTGTAGCGTGAAGACGACAGAA
AGGGCGTGGTGC GGAGGGCGGTGCGGTGGGATTCGAACCCACGACCCTCAGCTTTTTCTTGCT
GAATAGCTGCGCGTTTACCGCTACGGCTATCTTGGCCCCAAAATACCACACATCAACGCTATTA
TAAAATATTTTACTTGAATACATAGATCTACAAGCATCTCTCTCCATTCTTCAGCATAATGAAATG
TATAAATTTCTTTAACCCCTAGAAAGATAGTCTGCGTAAAATTGACGCATGCATCCTTGAATATT
GCTCTCTTTTCTAAATAGCGCGAATCCGTCGCAA
```

Length=358

Score E

AaegL5\_1 | organism=Aedes\_aegypti\_LVP\_AGWG | version=AaegL5 | l... 239 6e-60  
AaegL5\_2 | organism=Aedes\_aegypti\_LVP\_AGWG | version=AaegL5 | l... 214 2e-52  
AaegL5\_3 | organism=Aedes\_aegypti\_LVP\_AGWG | version=AaegL5 | l... 210 3e-51

Sequence found repetitive along *Ae. aegypti* genome

NcoI

GGTACTTCTACACCAAAAATGCAATAAAACTACTGTAAATTCAATAAATAACTCTAGTTAAATTAT  
CCAATTGCACTTTTCATCGAAATCGCATGGACTAACACGATACGAAAAAACTGCTTAGCGATTGA  
CAACAGTCACACCAGAGTGGATCTAAATAAGAGTGGCGTCAATGTCAAAAATTGGAACAGCGGCG  
AACTGTGAATTCCATACAAATCCGCGTTCCAATGAAGCAGGAGAAAAGGGAAAGGGCGGAGGG  
GGGTTCACTCTTGTTTACAGGCACTCTAAGTCACACCCTTTGTGATACAAGTCTCTTCCCCTGACT  
ACCCCATACTCTACCCCTCTCGGCACGCCATTTTCACTAAAACCTACAAACATAATCACATAAC  
GACTTAATTCAAATAAAAACCACGCAAAAAAATTACACATCACAAAAATTTATAAAAATTTACCAATG  
ACCTCTTTTAATTTAAAAAGCAAACAAAGTTAAATCCATTGTAATGAAAAAAAAAACAACTTTTGC  
CCATCAACGTGTGCGGGAAGCCCCGCGTATAAAAAAAGGTTCTTTGATTGTGTTGTTTTTCTG  
GCACTGGAACAAATATCCAGATCAATCCCTCAAAAAAAGCCATAATTTTTGAGACCCAATA  
AGAAGGGCAAAAATTAATTTAACCTAAAAAGAAAATCAATATTTGAAGTACCTTAAAAAAAAC  
AAGCCTTAAATTTACCC

Length=736

|                                                                    | Score | E     |
|--------------------------------------------------------------------|-------|-------|
| AeegL5_3   organism=Aedes_aegypti_LVP_AGWG   version=AeegL5   l... | 176   | 1e-40 |
| AeegL5_2   organism=Aedes_aegypti_LVP_AGWG   version=AeegL5   l... | 174   | 4e-40 |
| AeegL5_1   organism=Aedes_aegypti_LVP_AGWG   version=AeegL5   l... | 174   | 4e-40 |

Sequence found repetitive along *Ae. aegypti* genome

## Supplementary Text S2: Mathematical Modelling

### 2.1 Fitting Relative Fitness for Individual Gene Drive Constructs

To obtain relative fitness parameter values for individuals heterozygous or homozygous for a single transgenic construct, we first formulate a deterministic population genetics mathematical model that considers an infinite, closed (no migration), panmictic (random mating) population. This model is simulated using the following set of difference equations

$$m_{ww}(t) = \frac{1}{2} \left[ m_{ww}(t-1)f_{ww}(t-1) + \frac{1}{2}m_{ww}(t-1)f_{Xw}(t-1) + \frac{1}{2}m_{Xw}(t-1)f_{ww}(t-1) \right. \\ \left. + \frac{1}{4}m_{Xw}(t-1)f_{Xw}(t-1) \right] / \tilde{\Omega}, \quad (1)$$

$$m_{Xw}(t) = \frac{\Omega_{Xw}}{2} \left[ \frac{1}{2}m_{ww}(t-1)f_{Xw}(t-1) + m_{ww}(t-1)f_{XX}(t-1) + \frac{1}{2}m_{Xw}(t-1)f_{ww}(t-1) \right. \\ \left. + \frac{1}{2}m_{Xw}(t-1)f_{Xw}(t-1) + \frac{1}{2}m_{Xw}(t-1)f_{XX}(t-1) + m_{XX}(t-1)f_{Xw}(t-1) \right. \\ \left. + \frac{1}{2}m_{XX}(t-1)f_{Xw}(t-1) \right] / \tilde{\Omega}, \quad (2)$$

$$m_{XX}(t) = \frac{\Omega_{XX}}{2} \left[ \frac{1}{4}m_{Xw}(t-1)f_{Xw}(t-1) + \frac{1}{2}m_{Xw}(t-1)f_{XX}(t-1) + \frac{1}{2}m_{XX}f_{Xw}(t-1) \right. \\ \left. + m_{XX}(t-1)f_{XX}(t-1) \right] / \tilde{\Omega}, \quad (3)$$

$$f_{ww}(t) = \frac{1}{2} \left[ m_{ww}(t-1)f_{ww}(t-1) + \frac{1}{2}m_{ww}(t-1)f_{Xw}(t-1) + \frac{1}{2}m_{Xw}(t-1)f_{ww}(t-1) \right. \\ \left. + \frac{1}{4}m_{Xw}(t-1)f_{Xw}(t-1) \right] / \tilde{\Omega}, \quad (4)$$

$$f_{Xw}(t) = \frac{\Omega_{Xw}}{2} \left[ \frac{1}{2}m_{ww}(t-1)f_{Xw}(t-1) + m_{ww}(t-1)f_{XX}(t-1) + \frac{1}{2}m_{Xw}(t-1)f_{ww}(t-1) \right. \\ \left. + \frac{1}{2}m_{Xw}(t-1)f_{Xw}(t-1) + \frac{1}{2}m_{Xw}(t-1)f_{XX}(t-1) + m_{XX}(t-1)f_{Xw}(t-1) \right. \\ \left. + \frac{1}{2}m_{XX}(t-1)f_{Xw}(t-1) \right] / \tilde{\Omega}, \quad (5)$$

$$f_{XX}(t) = \frac{\Omega_{XX}}{2} \left[ \frac{1}{4}m_{Xw}(t-1)f_{Xw}(t-1) + \frac{1}{2}m_{Xw}(t-1)f_{XX}(t-1) + \frac{1}{2}m_{XX}f_{Xw}(t-1) \right. \\ \left. + m_{XX}(t-1)f_{XX}(t-1) \right] / \tilde{\Omega}, \quad (6)$$

in which  $m$  and  $f$  represent males and females of the genotype indicated in their respective subscripts ( $ww$  denoting wild-type,  $Xw$  transgene heterozygote and  $XX$  transgene homozygote) and  $\Omega$  is the fitness of a given genotype (in subscript) relative to wild-type - assumed equal for both sexes. The overall fitness of the entire population  $\tilde{\Omega}$  is calculated as the sum of all numerators in equations (1)-(6) and is used as a normalising factor to ensure genotype frequencies fill the entire range from zero to one.

To fit this model to experimental data (main text) we take a simple least squares regression approach. In particular we simultaneously fit relative fitness parameters for transgene heterozygous ( $\Omega_{Xw}$ ) and homozygous ( $\Omega_{XX}$ ) individuals by minimising the total error between two numerical simulations of the mathematical model representing the different single transgene experimental scenarios (fitting to the mean of the two experimental replicates). We model the scenario in which the initial cage setup consists of transgene heterozygous females and wild-type males via initial conditions of the form

$$m_{ww}(0) = 0.5, \quad m_{Xw}(0) = 0, \quad m_{XX}(0) = 0, \quad f_{ww}(0) = 0, \quad f_{Xw}(0) = 0.5, \quad f_{XX}(0) = 0,$$

and the case in which the initial cage consists of transgene heterozygous males and females via initial conditions of the form

$$m_{ww}(0) = 0, \quad m_{Xw}(0) = 0.5, \quad m_{XX}(0) = 0, \quad f_{ww}(0) = 0, \quad f_{Xw}(0) = 0.5, \quad f_{XX}(0) = 0.$$

The mathematical model presented here is simulated across a discretised parameter grid representing the full range of possible parameter values for the relative fitness of transgene heterozygote and transgene homozygote individuals, with the sum of squared errors between the numerical simulation and mean experimental results calculated at each point. The parameter combination giving the lowest squared error is the deemed to provide the best fit and is thus carried forward into other areas of investigation. Note that to provide a fair comparison to experimental data, mean squared errors are based on transgene carrier frequencies - calculated from our modelling results as the sum of *Xw* and *XX* genotype frequencies. All parameter fitting was performed using Matlab (version R2019a; The MathWorks Inc., Natick, MA).

## 2.2 Element B

Applying the procedure outlined above to the experimental data for cages containing only transgenic construct B (*bgn-Cas9*) gives the results in Figure S1. This provides a best fit to the experimental data where B transgene heterozygotes have relative fitness  $\Omega_{Xw}=1$  (i.e. no fitness cost) and B transgene homozygotes have relative fitness  $\Omega_{XX}=0.79$  (i.e. a fitness cost of 21%). In practice this means there is a significant fitness cost associated with being homozygous for transgenic construct B but no cost to being heterozygous (i.e. they display full wild-type fitness).

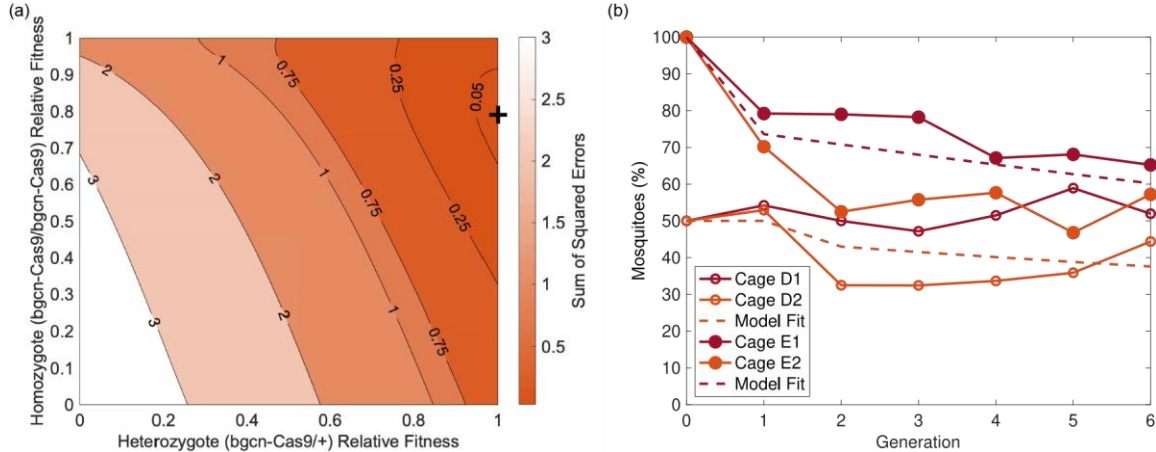

**Figure S1: Results of model fitting to experimental data from cage trials containing transgenic construct B (*bgn-Cas9*) only.** (a) Sum of squared errors between numerical simulations and the mean of experimental data for the full range of relative fitness parameters. Here the colour map represents the sum of squared errors with contour lines for certain values included to provide visual clarity. The black cross indicates the parameter combination providing the minimal sum of squared errors. (b) Visualisations of the optimal fit obtained between the mathematical model (dashed lines) and experimental data (solid lines) for the case in which B transgene heterozygous females and wild-type males are used to setup the cage (blue) and where B transgene heterozygote males and females were used to setup the cage (red).

## 2.3 Element A

A similar procedure was followed for cages containing only transgenic construct A ( $kmo^{sgRNAs}$ ). This gives the results in Figure S2, with the best fit being obtained where A transgene heterozygotes have relative fitness  $\Omega_{XW}=1$  (i.e. no fitness cost) and A transgene homozygotes have relative fitness  $\Omega_{XX}=0.81$  (i.e. a fitness cost of 19%). As in the case of the B element, here A construct homozygotes display a fairly significant fitness cost - albeit smaller cost than the B element - while heterozygotes display equal fitness to wild-type individuals.

## 2.4 Predicting Split-Drive Dynamics

The previous sections used population genetics mathematical models and least squares regression techniques to obtain estimated relative fitness parameters for  $B+/++$ ,  $BB/++$ ,  $++/A+$  and  $++/AA$  genotypes; i.e. those in which only one transgenic construct is present and therefore will not undergo any Cas9-based cleavage nor the resulting homology directed or end-joining repair mechanisms. Since

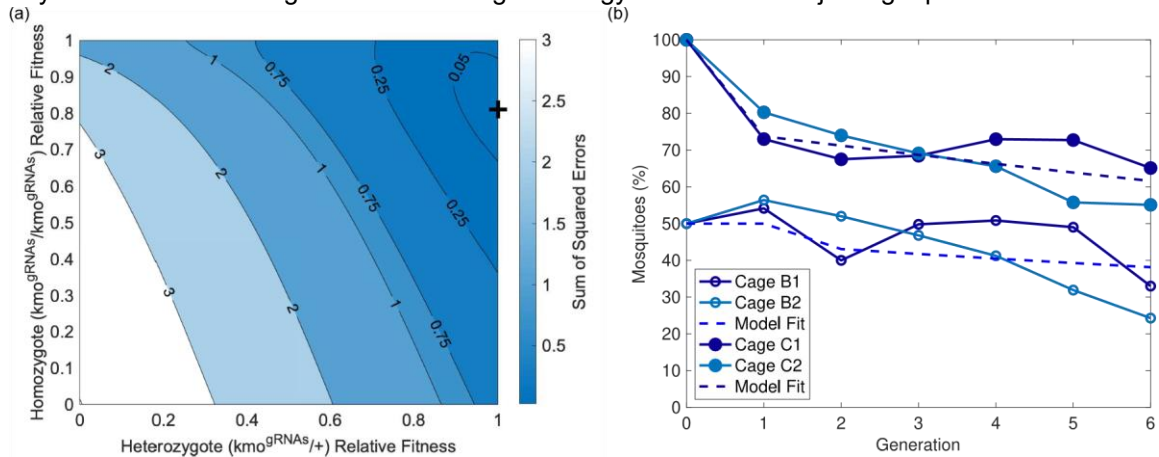

**Figure S2: Results of model fitting to experimental data from cage trials containing transgenic construct A ( $kmo^{sgRNAs}$ ) only.** (a) Sum of squared errors between numerical simulations and experimental data for all relative fitness parameters considered here. Here the colour map represents the sum of squared errors with contour lines for certain values included to provide visual clarity. The black cross indicates the parameter combination providing the minimal sum of squared errors. (b) Visualisations of the optimal fit obtained between the mathematical model (dashed lines) and experimental data (solid lines) for cases in which B transgene heterozygous females and wild-type males are used to setup the cage (blue) or where B transgene heterozygote males and females were used to setup the cage (red).

experimental work (in the main text) has directly measured homing rate parameters in both males and females, we simply require estimated relative fitness parameters for genotypes in which both the B and A transgenic constructs are present (i.e.  $B+/A+$ ,  $B+/AA$ ,  $BB/A+$  and  $BB/AA$ ). Comparing additive and multiplicative combinations of those relative fitness parameters obtained for  $B+/++$ ,  $BB/++$ ,  $++/A+$  and  $++/AA$  genotypes within the population genetics model outlined in Section 2.1 reveals a slightly smaller sum of squared errors between the mean of experimental data for carrier frequencies of only B or A and those carrying both B and A for a model considering additive fitness costs. This results in relative fitness parameters  $\Omega_{B+/A+} = 1$  (no fitness cost),  $\Omega_{B+/AA} = 0.81$  (19% fitness cost),  $\Omega_{BB/A+} = 0.79$  (21% fitness cost) and  $\Omega_{BB/AA} = 0.60$  (40% fitness cost). In practise the restriction to additive or multiplicative fitness costs means only the relative fitness parameter for the  $BB/AA$  genotype displays any difference between the two cases due to the earlier parameter fittings that found zero fitness costs for individuals heterozygous for either one of the transgenic constructs.

Allowing all four of the relative fitness parameters for B+/A+, B+/AA, BB/A+ and BB/AA genotypes to take any value in the range zero to one produces a slightly improved fit to experimental data, however the resulting parameter values did not produce results with any intuitive explanation. Thus we favour the use of an additive combination of relative fitness parameters obtained earlier, producing the results in Figure S3.

### 2.4.1 Split-Drive Mathematical Model

As in Section 1, we formulate here a deterministic population genetics mathematical model that considers an infinite, closed (no migration), panmictic (random mating) population with a total of nine different genotypes, namely +/+ (wild-type), +/A+, +/AA, B+/+, B+/A+, B+/AA, BB/+,

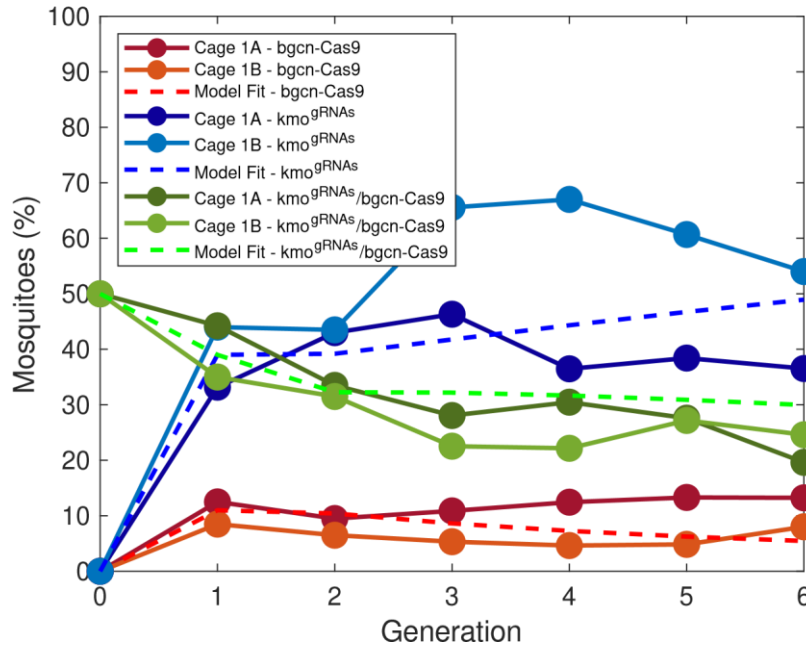

**Figure S3: Results of model fitting to experimental data from cage trials containing both split drive transgenic components (*kmo<sup>sgRNAs</sup>* (A) and *bgcn-Cas9*(B)).** Here solid lines show experimental data for the percentage of mosquitoes carrying only the B (red) or A (blue) construct or both the B and A (green) constructs. Dashed lines show results from a population genetics mathematical model considering an additive combination of relative fitness parameters obtained using the single construct mathematical models in Section 1.

BB/A+ and BB/AA. This model is simulated using the following set of difference equations

$$m_{+++} = \frac{\Omega_{+++}}{2} \left[ m_{+++}(t-1)f_{+++}(t-1) + \frac{1}{2}m_{+++}(t-1)f_{++/A+}(t-1) \right. \quad (7)$$

$$+ \frac{1}{2}m_{+++}(t-1)f_{B+/++}(t-1) + \frac{1}{4}m_{+++}(t-1)f_{B+/A+}(t-1)(1 - \Phi_F)$$

$$+ \frac{1}{2}m_{++/A+}(t-1)f_{+++}(t-1) + \frac{1}{4}m_{++/A+}(t-1)f_{++/A+}(t-1)$$

$$+ \frac{1}{4}m_{++/A+}(t-1)f_{B+/++}(t-1) + \frac{1}{8}m_{++/A+}(t-1)f_{B+/A+}(t-1)(1 - \Phi_F)$$

$$+ \frac{1}{2}m_{B+/++}(t-1)f_{+++}(t-1) + \frac{1}{4}m_{B+/++}(t-1)f_{++/A+}(t-1)$$

$$+ \frac{1}{4}m_{B+/++}(t-1)f_{B+/++}(t-1) + \frac{1}{8}m_{B+/++}(t-1)f_{B+/A+}(t-1)(1 - \Phi_F)$$

$$+ \frac{1}{4}m_{B+/A+}(t-1)(1 - \Phi_M)f_{+++}(t-1) + \frac{1}{8}m_{B+/A+}(t-1)(1 - \Phi_M)f_{++/A+}(t-1)$$

$$+ \frac{1}{8}m_{B+/A+}(t-1)(1 - \Phi_M)f_{B+/++}(t-1) + \frac{1}{16}m_{B+/A+}(t-1)(1 - \Phi_M)f_{B+/A+}(t-1)(1 - \Phi_F) \left. \right] / \tilde{\Omega}$$

$$m_{++/A+} = \frac{\Omega_{++/A+}}{2} \left[ \frac{1}{2}m_{+++}(t-1)f_{++/A+}(t-1) + m_{+++}(t-1)f_{++/AA}(t-1) \right. \quad (8)$$

$$+ \frac{1}{4}m_{+++}(t-1)f_{B+/A+}(t-1)(1 - \Phi_F) + \frac{1}{2}m_{+++}(t-1)f_{B+/AA}(t-1)$$



$$\begin{aligned}
& + \frac{1}{2}m_{++/A+}(t-1)f_{++/++}(t-1) + \frac{1}{2}m_{++/A+}(t-1)f_{++/A+}(t-1) \\
& + \frac{1}{2}m_{++/A+}(t-1)f_{++/AA}(t-1) + \frac{1}{4}m_{++/A+}(t-1)f_{B+/++}(t-1) \\
& + \frac{1}{4}m_{++/A+}(t-1)f_{B+/A+}(t-1)(1-\Phi_F) + \frac{1}{4}m_{++/A+}(t-1)f_{B+/AA}(t-1) \\
& + m_{++/AA}(t-1)f_{++/++}(t-1) + \frac{1}{2}m_{++/AA}(t-1)f_{++/A+}(t-1) \\
& + \frac{1}{2}m_{++/AA}(t-1)f_{B+/++}(t-1) + \frac{1}{4}m_{++/AA}(t-1)f_{B+/A+}(t-1)(1-\Phi_F) \\
& + \frac{1}{4}m_{B+/++}(t-1)f_{++/A+}(t-1) + \frac{1}{2}m_{B+/++}(t-1)f_{++/AA}(t-1) \\
& + \frac{1}{8}m_{B+/++}(t-1)f_{B+/A+}(t-1)(1-\Phi_F) + \frac{1}{4}m_{B+/++}(t-1)f_{B+/AA}(t-1) \\
& + \frac{1}{4}m_{B+/A+}(t-1)(1-\Phi_M)f_{++/++}(t-1) + \frac{1}{4}m_{B+/A+}(t-1)(1-\Phi_M)f_{++/A+}(t-1) \\
& + \frac{1}{4}m_{B+/A+}(t-1)(1-\Phi_M)f_{++/AA}(t-1) + \frac{1}{8}m_{B+/A+}(t-1)(1-\Phi_M)f_{B+/++}(t-1) \\
& + \frac{1}{8}m_{B+/A+}(t-1)(1-\Phi_M)f_{B+/A+}(t-1)(1-\Phi_F) + \frac{1}{8}m_{B+/A+}(t-1)(1-\Phi_M)f_{B+/AA}(t-1) \\
& + \frac{1}{2}m_{B+/AA}(t-1)f_{++/++}(t-1) + \frac{1}{4}m_{B+/AA}(t-1)f_{++/A+}(t-1) \\
& + \frac{1}{4}m_{B+/AA}(t-1)f_{B+/++}(t-1) + \frac{1}{8}m_{B+/AA}(t-1)f_{B+/A+}(t-1)(1-\Phi_F) \\
& + \frac{1}{2}m_{++/++}(t-1)f_{B+/A+}(t-1)\Phi_F + \frac{1}{4}m_{++/A+}(t-1)f_{B+/A+}(t-1)\Phi_F \\
& + \frac{1}{4}m_{B+/++}(t-1)f_{B+/A+}(t-1)\Phi_F + \frac{1}{8}m_{B+/A+}(t-1)f_{B+/A+}(t-1)\Phi_F(1-\Phi_M) \\
& + \frac{1}{2}m_{B+/A+}(t-1)f_{++/++}(t-1)\Phi_M + \frac{1}{4}m_{B+/A+}(t-1)f_{++/A+}(t-1)\Phi_M \\
& + \frac{1}{4}m_{B+/A+}(t-1)f_{B+/++}(t-1)\Phi_M + \frac{1}{8}m_{B+/A+}(t-1)f_{B+/A+}(t-1)\Phi_M(1-\Phi_F) \\
& + \frac{1}{8}(1-\Phi_M)m_{B+/A+}(t-1)\Phi_F f_{BB/A+}(t-1) \Big] / \tilde{\Omega},
\end{aligned}$$

$$m_{++/AA} = \frac{\Omega_{++/AA}}{2} \left[ \frac{1}{4}m_{++/A+}(t-1)f_{++/A+}(t-1) + \frac{1}{2}m_{++/A+}(t-1)f_{++/AA}(t-1) \right] \quad (9)$$

$$\begin{aligned}
& + \frac{1}{8}m_{++/A+}(t-1)f_{B+/A+}(t-1)(1-\Phi_F) + \frac{1}{4}m_{++/A+}(t-1)f_{B+/AA}(t-1) \\
& + \frac{1}{2}m_{++/AA}(t-1)f_{++/A+}(t-1) + m_{++/AA}(t-1)f_{++/AA}(t-1) \\
& + \frac{1}{4}m_{++/AA}(t-1)f_{B+/A+}(t-1)(1-\Phi_F) + \frac{1}{2}m_{++/AA}(t-1)f_{B+/AA}(t-1) \\
& + \frac{1}{8}m_{B+/A+}(t-1)(1-\Phi_M)f_{++/A+}(t-1) + \frac{1}{4}m_{B+/A+}(t-1)(1-\Phi_M)f_{++/AA}(t-1) \\
& + \frac{1}{16}m_{B+/A+}(t-1)(1-\Phi_M)f_{B+/A+}(t-1)(1-\Phi_F) + \frac{1}{8}m_{B+/A+}(t-1)(1-\Phi_M)f_{B+/AA}(t-1) \\
& + \frac{1}{4}m_{B+/AA}(t-1)f_{++/A+}(t-1) + \frac{1}{2}m_{B+/AA}(t-1)f_{++/AA}(t-1) \\
& + \frac{1}{8}m_{B+/AA}(t-1)f_{B+/A+}(t-1)(1-\Phi_F) + \frac{1}{4}m_{B+/AA}(t-1)f_{B+/AA}(t-1) \\
& + \frac{1}{4}m_{++/A+}(t-1)f_{B+/A+}(t-1)\Phi_F + \frac{1}{2}m_{++/AA}(t-1)f_{B+/A+}(t-1)\Phi_F \\
& + \frac{1}{8}m_{B+/A+}(t-1)f_{B+/A+}(t-1)\Phi_F(1-\Phi_M) + \frac{1}{4}m_{B+/AA}(t-1)f_{B+/A+}(t-1)\Phi_F \\
& + \frac{1}{4}m_{B+/A+}(t-1)f_{++/A+}(t-1)\Phi_M + \frac{1}{2}m_{B+/A+}(t-1)f_{++/AA}(t-1)\Phi_M \\
& + \frac{1}{8}m_{B+/A+}(t-1)f_{B+/A+}(t-1)\Phi_M(1-\Phi_F) + \frac{1}{4}m_{B+/A+}(t-1)f_{B+/AA}(t-1)\Phi_M
\end{aligned}$$

$$\begin{aligned}
& + \frac{1}{4}m_{B+/A+}(t-1)f_{B+/A+}(t-1)\Phi_M\Phi_F + \frac{1}{8}(1-\Phi_M)m_{B+/A+}(t-1)\Phi_F f_{BB/A+}(t-1) \Big] / \tilde{\Omega}, \\
m_{B+/++} &= \frac{\Omega_{B+/++}}{2} \left[ \frac{1}{2}m_{++/++}(t-1)f_{B+/++}(t-1) + \frac{1}{4}m_{++/++}(t-1)f_{B+/A+}(t-1)(1-\Phi_F) \right. \\
& + m_{++/++}(t-1)f_{BB/++}(t-1) + \frac{1}{2}m_{++/++}(t-1)f_{BB/A+}(t-1)(1-\Phi_F) \\
& + \frac{1}{4}m_{++/A+}(t-1)f_{B+/++}(t-1) + \frac{1}{8}m_{++/A+}(t-1)f_{B+/A+}(t-1)(1-\Phi_F) \\
& + \frac{1}{2}m_{++/A+}(t-1)f_{BB/++}(t-1) + \frac{1}{4}m_{++/A+}(t-1)f_{BB/A+}(t-1)(1-\Phi_F) \\
& + \frac{1}{2}m_{B+/++}(t-1)f_{++/++}(t-1) + \frac{1}{4}m_{B+/++}(t-1)f_{++/A+}(t-1) \\
& + \frac{1}{2}m_{B+/++}(t-1)f_{B+/++}(t-1) + \frac{1}{4}m_{B+/++}(t-1)f_{B+/A+}(t-1)(1-\Phi_F) \\
& + \frac{1}{2}m_{B+/++}(t-1)f_{BB/++}(t-1) + \frac{1}{4}m_{B+/++}(t-1)f_{BB/A+}(t-1)(1-\Phi_F) \\
& + \frac{1}{4}m_{B+/A+}(t-1)(1-\Phi_M)f_{++/++}(t-1) + \frac{1}{8}m_{B+/A+}(t-1)(1-\Phi_M)f_{++/A+}(t-1) \\
& + \frac{1}{4}m_{B+/A+}(t-1)(1-\Phi_M)f_{B+/++}(t-1) + \frac{1}{8}m_{B+/A+}(t-1)(1-\Phi_M)f_{B+/A+}(t-1)(1-\Phi_F) \\
& + \frac{1}{4}m_{B+/A+}(t-1)(1-\Phi_M)f_{BB/++}(t-1) + \frac{1}{8}m_{B+/A+}(t-1)(1-\Phi_M)f_{BB/A+}(t-1)(1-\Phi_F) \\
& + m_{BB/++}(t-1)f_{++/++}(t-1) + \frac{1}{2}m_{BB/++}(t-1)f_{++/A+}(t-1) \\
& + \frac{1}{2}m_{BB/++}(t-1)f_{B+/++}(t-1) + \frac{1}{4}m_{BB/++}(t-1)f_{B+/A+}(t-1)(1-\Phi_F) \\
& + \frac{1}{2}m_{BB/A+}(t-1)(1-\Phi_M)f_{++/++}(t-1) + \frac{1}{4}m_{BB/A+}(t-1)(1-\Phi_M)f_{++/A+}(t-1) \\
& + \frac{1}{4}m_{BB/A+}(t-1)(1-\Phi_M)f_{B+/++}(t-1) + \frac{1}{8}m_{BB/A+}(t-1)(1-\Phi_M)f_{B+/A+}(t-1)(1-\Phi_F) \Big] / \tilde{\Omega} \\
m_{B+/A+} &= \frac{\Omega_{B+/A+}}{2} \left[ \frac{1}{4}m_{++/++}(t-1)f_{B+/A+}(t-1)(1-\Phi_F) + \frac{1}{2}m_{++/++}(t-1)f_{B+/AA}(t-1) \right. \\
& + \frac{1}{2}m_{++/++}(t-1)f_{BB/A+}(t-1)(1-\Phi_F) + m_{++/++}(t-1)f_{BB/AA}(t-1) \\
& + \frac{1}{4}m_{++/A+}(t-1)f_{B+/++}(t-1) + \frac{1}{4}m_{++/A+}(t-1)f_{B+/A+}(t-1)(1-\Phi_F) \\
& + \frac{1}{4}m_{++/A+}(t-1)f_{B+/AA}(t-1) + \frac{1}{2}m_{++/A+}(t-1)f_{BB/++}(t-1) \\
& + \frac{1}{2}m_{++/A+}(t-1)f_{BB/A+}(t-1)(1-\Phi_F) + \frac{1}{2}m_{++/A+}(t-1)f_{BB/AA}(t-1) \\
& + \frac{1}{2}m_{++/AA}(t-1)f_{B+/++}(t-1) + \frac{1}{4}m_{++/AA}(t-1)f_{B+/A+}(t-1)(1-\Phi_F) \\
& + m_{++/AA}(t-1)f_{BB/++}(t-1) + \frac{1}{2}m_{++/AA}(t-1)f_{BB/A+}(t-1)(1-\Phi_F) \\
& + \frac{1}{4}m_{B+/++}(t-1)f_{++/A+}(t-1) + \frac{1}{2}m_{B+/++}(t-1)f_{++/AA}(t-1) \\
& + \frac{1}{4}m_{B+/++}(t-1)f_{B+/A+}(t-1)(1-\Phi_F) + \frac{1}{2}m_{B+/++}(t-1)f_{B+/AA}(t-1) \\
& + \frac{1}{4}m_{B+/++}(t-1)f_{BB/A+}(t-1)(1-\Phi_F) + \frac{1}{2}m_{B+/++}(t-1)f_{BB/AA}(t-1) \\
& + \frac{1}{4}m_{B+/A+}(t-1)(1-\Phi_M)f_{++/++}(t-1) + \frac{1}{4}m_{B+/A+}(t-1)(1-\Phi_M)f_{++/A+}(t-1) \\
& + \frac{1}{4}m_{B+/A+}(t-1)(1-\Phi_M)f_{++/AA}(t-1) + \frac{1}{4}m_{B+/A+}(t-1)(1-\Phi_M)f_{B+/++}(t-1) \\
& + \frac{1}{4}m_{B+/A+}(t-1)(1-\Phi_M)f_{B+/A+}(t-1)(1-\Phi_F) + \frac{1}{4}m_{B+/A+}(t-1)(1-\Phi_M)f_{B+/AA}(t-1) \Big] / \tilde{\Omega}
\end{aligned}$$

$$\begin{aligned}
& + \frac{1}{4}m_{B+/A+}(t-1)(1-\Phi_M)f_{BB/++}(t-1) + \frac{1}{4}m_{B+/A+}(t-1)(1-\Phi_M)f_{BB/A+}(t-1)(1-\Phi_F) \\
& + \frac{1}{4}m_{B+/A+}(t-1)(1-\Phi_M)f_{BB/AA}(t-1) + \frac{1}{2}m_{B+/AA}(t-1)f_{++/++}(t-1) \\
& + \frac{1}{4}m_{B+/AA}(t-1)f_{++/A+}(t-1) + \frac{1}{2}m_{B+/AA}(t-1)f_{B+/++}(t-1) \\
& + \frac{1}{4}m_{B+/AA}(t-1)f_{B+/A+}(t-1)(1-\Phi_F) + \frac{1}{2}m_{B+/AA}(t-1)f_{BB/++}(t-1) \\
& + \frac{1}{4}m_{B+/AA}(t-1)f_{BB/A+}(t-1)(1-\Phi_F) + \frac{1}{2}m_{BB/++}(t-1)f_{++/A+}(t-1) \\
& + m_{BB/++}(t-1)f_{++/AA}(t-1) + \frac{1}{4}m_{BB/++}(t-1)f_{B+/A+}(t-1)(1-\Phi_F) \\
& + \frac{1}{2}m_{BB/++}(t-1)f_{B+/AA}(t-1) + \frac{1}{2}m_{BB/A+}(t-1)(1-\Phi_M)f_{++/++}(t-1) \\
& + \frac{1}{2}m_{BB/A+}(t-1)(1-\Phi_M)f_{++/A+}(t-1) + \frac{1}{2}m_{BB/A+}(t-1)(1-\Phi_M)f_{++/AA}(t-1) \\
& + \frac{1}{4}m_{BB/A+}(t-1)(1-\Phi_M)f_{B+/++}(t-1) + \frac{1}{4}m_{BB/A+}(t-1)(1-\Phi_M)f_{B+/A+}(t-1)(1-\Phi_F) \\
& + \frac{1}{4}m_{BB/A+}(t-1)(1-\Phi_M)f_{B+/AA}(t-1) + m_{BB/AA}(t-1)f_{++/++}(t-1) \\
& + \frac{1}{2}m_{BB/AA}(t-1)f_{++/A+}(t-1) + \frac{1}{2}m_{BB/AA}(t-1)f_{B+/++}(t-1) \\
& + \frac{1}{4}m_{BB/AA}(t-1)f_{B+/A+}(t-1)(1-\Phi_F) + \frac{1}{2}m_{++/++}(t-1)f_{B+/A+}(t-1)\Phi_F \\
& + m_{++/++}(t-1)f_{BB/A+}(t-1)\Phi_F + \frac{1}{4}m_{++/A+}(t-1)f_{B+/A+}(t-1)\Phi_F \\
& + \frac{1}{2}m_{++/A+}(t-1)f_{BB/A+}(t-1)\Phi_F + \frac{1}{2}m_{B+/++}(t-1)f_{B+/A+}(t-1)\Phi_F \\
& + \frac{1}{2}m_{B+/++}(t-1)f_{BB/A+}(t-1)\Phi_F + \frac{1}{4}m_{B+/A+}(t-1)f_{B+/A+}(t-1)\Phi_F(1-\Phi_M) \\
& + \frac{1}{4}m_{B+/A+}(t-1)f_{BB/A+}(t-1)\Phi_F(1-\Phi_M) + \frac{1}{2}m_{BB/++}(t-1)f_{B+/A+}(t-1)\Phi_F \\
& + \frac{1}{4}m_{BB/A+}(t-1)f_{B+/A+}(t-1)\Phi_F(1-\Phi_M) + \frac{1}{2}m_{B+/A+}(t-1)f_{++/++}(t-1)\Phi_M \\
& + \frac{1}{4}m_{B+/A+}(t-1)f_{++/A+}(t-1)\Phi_M + \frac{1}{2}m_{B+/A+}(t-1)f_{B+/++}(t-1)\Phi_M \\
& + \frac{1}{4}m_{B+/A+}(t-1)f_{B+/A+}(t-1)\Phi_M(1-\Phi_F) + \frac{1}{2}m_{B+/A+}(t-1)f_{BB/++}(t-1)\Phi_M \\
& + \frac{1}{4}m_{B+/A+}(t-1)f_{BB/A+}(t-1)\Phi_M(1-\Phi_F) + m_{BB/A+}(t-1)f_{++/++}(t-1)\Phi_M \\
& + \frac{1}{2}m_{BB/A+}(t-1)f_{++/A+}(t-1)\Phi_M + \frac{1}{2}m_{BB/A+}(t-1)f_{B+/++}(t-1)\Phi_M \\
& + \frac{1}{4}m_{BB/A+}(t-1)f_{B+/A+}(t-1)\Phi_M(1-\Phi_F) \Big] / \bar{\Omega},
\end{aligned}$$

$$m_{B+/AA} = \frac{\Omega_{B+/AA}}{2} \left[ \frac{1}{8}m_{++/A+}(t-1)f_{B+/A+}(t-1)(1-\Phi_F) + \frac{1}{4}m_{++/A+}(t-1)f_{B+/AA}(t-1) \right] \quad (12)$$

$$\begin{aligned}
& + \frac{1}{4}m_{++/A+}(t-1)f_{BB/A+}(t-1)(1-\Phi_F) + \frac{1}{2}m_{++/A+}(t-1)f_{BB/AA}(t-1) \\
& + \frac{1}{4}m_{++/AA}(t-1)f_{B+/A+}(t-1)(1-\Phi_F) + \frac{1}{2}m_{++/AA}(t-1)f_{B+/AA}(t-1) \\
& + \frac{1}{2}m_{++/AA}(t-1)f_{BB/A+}(t-1)(1-\Phi_F) + m_{++/AA}(t-1)f_{BB/AA}(t-1) \\
& + \frac{1}{8}m_{B+/A+}(t-1)(1-\Phi_M)f_{++/A+}(t-1) + \frac{1}{4}m_{B+/A+}(t-1)(1-\Phi_M)f_{++/AA}(t-1) \\
& + \frac{1}{8}m_{B+/A+}(t-1)(1-\Phi_M)f_{B+/A+}(t-1)(1-\Phi_F) + \frac{1}{4}m_{B+/A+}(t-1)(1-\Phi_M)f_{B+/AA}(t-1) \quad (\mathbf{11})
\end{aligned}$$

$$\begin{aligned}
& + \frac{1}{8}m_{B+/A+}(t-1)(1-\Phi_M)f_{BB/A+}(t-1)(1-\Phi_F) + \frac{1}{4}m_{B+/A+}(t-1)(1-\Phi_M)f_{BB/AA}(t-1) \\
& + \frac{1}{4}m_{B+/AA}(t-1)f_{++/A+}(t-1) + \frac{1}{2}m_{B+/AA}(t-1)f_{++/AA}(t-1) \\
& + \frac{1}{4}m_{B+/AA}(t-1)f_{B+/A+}(t-1)(1-\Phi_F) + \frac{1}{2}m_{B+/AA}(t-1)f_{B+/AA}(t-1) \\
& + \frac{1}{4}m_{B+/AA}(t-1)f_{BB/A+}(t-1)(1-\Phi_F) + \frac{1}{2}m_{B+/AA}(t-1)f_{BB/AA}(t-1) \\
& + \frac{1}{4}m_{BB/A+}(t-1)(1-\Phi_M)f_{++/A+}(t-1) + \frac{1}{2}m_{BB/A+}(t-1)(1-\Phi_M)f_{++/AA}(t-1) \\
& + \frac{1}{8}m_{BB/A+}(t-1)(1-\Phi_M)f_{B+/A+}(t-1)(1-\Phi_F) + \frac{1}{4}m_{BB/A+}(t-1)(1-\Phi_M)f_{B+/AA}(t-1) \\
& + \frac{1}{2}m_{BB/AA}(t-1)f_{++/A+}(t-1) + m_{BB/AA}(t-1)f_{++/AA}(t-1) \\
& + \frac{1}{4}m_{BB/AA}(t-1)f_{B+/A+}(t-1)(1-\Phi_F) + \frac{1}{2}m_{BB/AA}(t-1)f_{B+/AA}(t-1) \\
& + \frac{1}{4}m_{++/A+}(t-1)f_{B+/A+}(t-1)\Phi_F + \frac{1}{2}m_{++/A+}(t-1)f_{BB/A+}(t-1)\Phi_F \\
& + \frac{1}{2}m_{++/AA}(t-1)f_{B+/A+}(t-1)\Phi_F + m_{++/AA}(t-1)f_{BB/A+}(t-1)\Phi_F \\
& + \frac{1}{4}m_{B+/A+}(t-1)f_{B+/A+}(t-1)\Phi_F(1-\Phi_M) + \frac{1}{4}m_{B+/A+}(t-1)f_{BB/A+}(t-1)\Phi_F(1-\Phi_M) \\
& + \frac{1}{2}m_{B+/AA}(t-1)f_{B+/A+}(t-1)\Phi_F + \frac{1}{2}m_{B+/AA}(t-1)f_{BB/A+}(t-1)\Phi_F \\
& + \frac{1}{4}m_{BB/A+}(t-1)f_{B+/A+}(t-1)\Phi_F(1-\Phi_M) + \frac{1}{2}m_{BB/AA}(t-1)f_{B+/A+}(t-1)\Phi_F \\
& + \frac{1}{4}m_{B+/A+}(t-1)f_{++/A+}(t-1)\Phi_M + \frac{1}{2}m_{B+/A+}(t-1)f_{++/AA}(t-1)\Phi_M \\
& + \frac{1}{4}m_{B+/A+}(t-1)f_{B+/A+}(t-1)\Phi_M(1-\Phi_F) + \frac{1}{2}m_{B+/A+}(t-1)f_{B+/AA}(t-1)\Phi_M \\
& + \frac{1}{4}m_{B+/A+}(t-1)f_{BB/A+}(t-1)\Phi_M(1-\Phi_F) + \frac{1}{2}m_{B+/A+}(t-1)f_{BB/AA}(t-1)\Phi_M \\
& + \frac{1}{2}m_{BB/A+}(t-1)f_{++/A+}(t-1)\Phi_M + m_{BB/A+}(t-1)f_{++/AA}(t-1)\Phi_M \\
& + \frac{1}{4}m_{BB/A+}(t-1)f_{B+/A+}(t-1)\Phi_M(1-\Phi_F) + \frac{1}{2}m_{BB/A+}(t-1)f_{B+/AA}(t-1)\Phi_M \\
& + \frac{1}{2}m_{B+/A+}(t-1)f_{B+/A+}(t-1)\Phi_M\Phi_F + \frac{1}{2}m_{B+/A+}(t-1)f_{BB/A+}(t-1)\Phi_M\Phi_F \\
& + \frac{1}{2}m_{BB/A+}(t-1)f_{B+/A+}(t-1)\Phi_M\Phi_F \Big] / \tilde{\Omega}, \\
m_{BB/++} & = \frac{\Omega_{BB/++}}{2} \left[ \frac{1}{4}m_{B+/++}(t-1)f_{B+/++}(t-1) + \frac{1}{8}m_{B+/++}(t-1)f_{B+/A+}(t-1)(1-\Phi_F) \right. \\
& + \frac{1}{2}m_{B+/++}(t-1)f_{BB/++}(t-1) + \frac{1}{4}m_{B+/++}(t-1)f_{BB/A+}(t-1)(1-\Phi_F) \\
& + \frac{1}{8}m_{B+/A+}(t-1)(1-\Phi_M)f_{B+/++}(t-1) + \frac{1}{16}m_{B+/A+}(t-1)(1-\Phi_M)f_{B+/A+}(t-1)(1-\Phi_F) \\
& + \frac{1}{4}m_{B+/A+}(t-1)(1-\Phi_M)f_{BB/++}(t-1) + \frac{1}{8}m_{B+/A+}(t-1)(1-\Phi_M)f_{BB/A+}(t-1)(1-\Phi_F) \\
& + \frac{1}{2}m_{BB/++}(t-1)f_{B+/++}(t-1) + \frac{1}{4}m_{BB/++}(t-1)f_{B+/A+}(t-1)(1-\Phi_F) \\
& + m_{BB/++}(t-1)f_{BB/++}(t-1) + \frac{1}{2}m_{BB/++}(t-1)f_{BB/A+}(t-1)(1-\Phi_F) \\
& + \frac{1}{4}m_{BB/A+}(t-1)(1-\Phi_M)f_{B+/++}(t-1) + \frac{1}{8}m_{BB/A+}(t-1)(1-\Phi_M)f_{B+/A+}(t-1)(1-\Phi_F) \\
& \left. + \frac{1}{2}m_{BB/A+}(t-1)(1-\Phi_M)f_{BB/++}(t-1) + \frac{1}{4}m_{BB/A+}(t-1)(1-\Phi_M)f_{BB/A+}(t-1)(1-\Phi_F) \right] / \tilde{\Omega}
\end{aligned}
\tag{13}$$

$$\begin{aligned}
m_{BB/A+} = & \frac{\Omega_{BB/A+}}{2} \left[ \frac{1}{8} m_{B+/++}(t-1) f_{B+/A+}(t-1) (1 - \Phi_F) + \frac{1}{4} m_{B+/++}(t-1) f_{B+/AA}(t-1) \right. \\
& + \frac{1}{4} m_{B+/++}(t-1) f_{BB/A+}(t-1) (1 - \Phi_F) + \frac{1}{2} m_{B+/++}(t-1) f_{BB/AA}(t-1) \\
& + \frac{1}{8} m_{B+/A+}(t-1) (1 - \Phi_M) f_{B+/++}(t-1) + \frac{1}{8} m_{B+/A+}(t-1) (1 - \Phi_M) f_{B+/A+}(t-1) (1 - \Phi_F) \\
& + \frac{1}{8} m_{B+/A+}(t-1) (1 - \Phi_M) f_{B+/AA}(t-1) + \frac{1}{4} m_{B+/A+}(t-1) (1 - \Phi_M) f_{BB/++}(t-1) \\
& + \frac{1}{4} m_{B+/A+}(t-1) (1 - \Phi_M) f_{BB/A+}(t-1) (1 - \Phi_F) + \frac{1}{4} m_{B+/A+}(t-1) (1 - \Phi_M) f_{BB/AA}(t-1) \\
& + \frac{1}{4} m_{B+/AA}(t-1) f_{B+/++}(t-1) + \frac{1}{8} m_{B+/AA}(t-1) f_{B+/A+}(t-1) (1 - \Phi_F) \\
& + \frac{1}{2} m_{B+/AA}(t-1) f_{BB/++}(t-1) + \frac{1}{4} m_{B+/AA}(t-1) f_{BB/A+}(t-1) (1 - \Phi_F) \\
& + \frac{1}{4} m_{BB/++}(t-1) f_{B+/A+}(t-1) (1 - \Phi_F) + \frac{1}{2} m_{BB/++}(t-1) f_{B+/AA}(t-1) \\
& + \frac{1}{2} m_{BB/++}(t-1) f_{BB/A+}(t-1) (1 - \Phi_F) + m_{BB/++}(t-1) f_{BB/AA}(t-1) \\
& + \frac{1}{4} m_{BB/A+}(t-1) (1 - \Phi_M) f_{B+/++}(t-1) + \frac{1}{4} m_{BB/A+}(t-1) (1 - \Phi_M) f_{B+/A+}(t-1) (1 - \Phi_F) \\
& + \frac{1}{4} m_{BB/A+}(t-1) (1 - \Phi_M) f_{B+/AA}(t-1) + \frac{1}{2} m_{BB/A+}(t-1) (1 - \Phi_M) f_{BB/++}(t-1) \\
& + \frac{1}{2} m_{BB/A+}(t-1) (1 - \Phi_M) f_{BB/A+}(t-1) (1 - \Phi_F) + \frac{1}{2} m_{BB/A+}(t-1) (1 - \Phi_M) f_{BB/AA}(t-1) \\
& + \frac{1}{2} m_{BB/AA}(t-1) f_{B+/++}(t-1) + \frac{1}{4} m_{BB/AA}(t-1) f_{B+/A+}(t-1) (1 - \Phi_F) \\
& + m_{BB/AA}(t-1) f_{BB/++}(t-1) + \frac{1}{2} m_{BB/AA}(t-1) f_{BB/A+}(t-1) (1 - \Phi_F) \\
& + \frac{1}{4} m_{B+/++}(t-1) f_{B+/A+}(t-1) \Phi_F + \frac{1}{2} m_{B+/++}(t-1) f_{BB/A+}(t-1) \Phi_F \\
& + \frac{1}{8} m_{B+/A+}(t-1) f_{B+/A+}(t-1) \Phi_F (1 - \Phi_M) + \frac{1}{8} m_{B+/A+}(t-1) f_{BB/A+}(t-1) \Phi_F (1 - \Phi_M) \\
& + \frac{1}{2} m_{BB/++}(t-1) f_{B+/A+}(t-1) \Phi_F + m_{BB/++}(t-1) f_{BB/A+}(t-1) \Phi_F \\
& + \frac{1}{4} m_{BB/A+}(t-1) f_{B+/A+}(t-1) \Phi_F (1 - \Phi_M) + \frac{1}{2} m_{BB/A+}(t-1) f_{BB/A+}(t-1) \Phi_F (1 - \Phi_M) \\
& + \frac{1}{4} m_{B+/A+}(t-1) f_{B+/++}(t-1) \Phi_M + \frac{1}{8} m_{B+/A+}(t-1) f_{B+/A+}(t-1) \Phi_M (1 - \Phi_F) \\
& + \frac{1}{2} m_{B+/A+}(t-1) f_{BB/++}(t-1) \Phi_M + \frac{1}{4} m_{B+/A+}(t-1) f_{BB/A+}(t-1) \Phi_M (1 - \Phi_F) \\
& + \frac{1}{2} m_{BB/A+}(t-1) f_{B+/++}(t-1) \Phi_M + \frac{1}{4} m_{BB/A+}(t-1) f_{B+/A+}(t-1) \Phi_M (1 - \Phi_F) \\
& \left. + m_{BB/A+}(t-1) f_{BB/++}(t-1) \Phi_M + \frac{1}{2} m_{BB/A+}(t-1) f_{BB/A+}(t-1) \Phi_M (1 - \Phi_F) \right] / \tilde{\Omega},
\end{aligned}$$

$$\begin{aligned}
m_{BB/AA} = & \frac{\Omega_{BB/AA}}{2} \left[ \frac{1}{16} m_{B+/A+}(t-1) (1 - \Phi_M) f_{B+/A+}(t-1) (1 - \Phi_F) \right. \\
& + \frac{1}{8} m_{B+/A+}(t-1) (1 - \Phi_M) f_{B+/AA}(t-1) + \frac{1}{8} m_{B+/A+}(t-1) (1 - \Phi_M) f_{BB/A+}(t-1) (1 - \Phi_F) \\
& + \frac{1}{4} m_{B+/A+}(t-1) (1 - \Phi_M) f_{BB/AA}(t-1) + \frac{1}{8} m_{B+/AA}(t-1) f_{B+/A+}(t-1) (1 - \Phi_F) \\
& + \frac{1}{4} m_{B+/AA}(t-1) f_{B+/AA}(t-1) + \frac{1}{4} m_{B+/AA}(t-1) f_{BB/A+}(t-1) (1 - \Phi_F) \\
& + \frac{1}{2} m_{B+/AA}(t-1) f_{BB/AA}(t-1) + \frac{1}{8} m_{BB/A+}(t-1) (1 - \Phi_M) f_{B+/A+}(t-1) (1 - \Phi_F) \\
& \left. + \frac{1}{4} m_{BB/A+}(t-1) (1 - \Phi_M) f_{B+/AA}(t-1) + \frac{1}{4} m_{BB/A+}(t-1) (1 - \Phi_M) f_{BB/A+}(t-1) (1 - \Phi_F) \right] \\
& + \frac{1}{4} m_{BB/A+}(t-1) (1 - \Phi_M) f_{B+/AA}(t-1) + \frac{1}{4} m_{BB/A+}(t-1) (1 - \Phi_M) f_{BB/A+}(t-1) (1 - \Phi_F)
\end{aligned} \tag{15}$$

$$\begin{aligned}
& + \frac{1}{2}m_{BB/A+}(t-1)(1-\Phi_M)f_{BB/AA}(t-1) + \frac{1}{4}m_{BB/AA}(t-1)f_{B+/A+}(t-1)(1-\Phi_F) \\
& + \frac{1}{2}m_{BB/AA}(t-1)f_{B+/AA}(t-1) + \frac{1}{2}m_{BB/AA}(t-1)f_{BB/A+}(t-1)(1-\Phi_F) \\
& + m_{BB/AA}(t-1)f_{BB/AA}(t-1) + \frac{1}{8}m_{B+/A+}(t-1)f_{B+/A+}(t-1)\Phi_F(1-\Phi_M) \\
& + \frac{1}{8}m_{B+/A+}(t-1)f_{BB/A+}(t-1)\Phi_F(1-\Phi_M) + \frac{1}{4}m_{B+/AA}(t-1)f_{B+/A+}(t-1)\Phi_F \\
& + \frac{1}{2}m_{B+/AA}(t-1)f_{BB/A+}(t-1)\Phi_F + \frac{1}{4}m_{BB/A+}(t-1)f_{B+/A+}(t-1)\Phi_F(1-\Phi_M) \\
& + \frac{1}{2}m_{BB/A+}(t-1)f_{BB/A+}(t-1)\Phi_F(1-\Phi_M) + \frac{1}{2}m_{BB/AA}(t-1)f_{B+/A+}(t-1)\Phi_F \\
& + m_{BB/AA}(t-1)f_{BB/A+}(t-1)\Phi_F + \frac{1}{8}m_{B+/A+}(t-1)f_{B+/A+}(t-1)\Phi_M(1-\Phi_F) \\
& + \frac{1}{4}m_{B+/A+}(t-1)f_{B+/AA}(t-1)\Phi_M + \frac{1}{4}m_{B+/A+}(t-1)f_{BB/A+}(t-1)\Phi_M(1-\Phi_F) \\
& + \frac{1}{2}m_{B+/A+}(t-1)f_{BB/AA}(t-1)\Phi_M + \frac{1}{4}m_{BB/A+}(t-1)f_{B+/A+}(t-1)\Phi_M(1-\Phi_F) \\
& + \frac{1}{2}m_{BB/A+}(t-1)f_{B+/AA}(t-1)\Phi_M + \frac{1}{2}m_{BB/A+}(t-1)f_{BB/A+}(t-1)\Phi_M(1-\Phi_F) \\
& + m_{BB/A+}(t-1)f_{BB/AA}(t-1)\Phi_M + \frac{1}{4}m_{B+/A+}(t-1)f_{B+/A+}(t-1)\Phi_M\Phi_F \\
& + \frac{1}{2}m_{B+/A+}(t-1)f_{BB/A+}(t-1)\Phi_M\Phi_F + \frac{1}{2}m_{BB/A+}(t-1)f_{B+/A+}(t-1)\Phi_M\Phi_F \\
& + m_{BB/A+}(t-1)f_{BB/A+}(t-1)\Phi_M\Phi_F] / \tilde{\Omega},
\end{aligned}$$

and nine identical equations for females of these genotypes. Here  $m$  and  $f$  represent males and females of the genotype indicated in their respective subscripts and  $\Omega$  is the fitness of a given genotype (in subscript) relative to wild-type. The overall fitness of the entire population  $\Omega$  is calculated as the sum of all numerators in equations (7)-(15) and is used as a normalising factor to ensure genotype frequencies fill the entire range from zero to one.

To predict the results of the split drive treatment cages (main text) we compare the sum of squared errors for B, A and B/A carriers to model results for additive or multiplicative combinations of the relative fitness parameters obtained in Section 1. These produced very similar goodness of fit and so an additive combination of fitness parameters was utilized since this yields a simple and intuitive explanation of fitness cost interactions. The particular model scenario considered is that in which the initial cage setup consists of females heterozygous for both transgenic constructs and wild-type males, leading to initial conditions of the form

$$\begin{aligned}
m_{+/+/+}(0) &= 0.5, & m_{+/+/A+}(0) &= 0, & m_{+/+/AA}(0) &= 0, & m_{B+/+/+}(0) &= 0, & m_{B+/+/A+}(0) &= 0, \\
m_{B+/+/AA}(0) &= 0, & m_{BB/+/+}(0) &= 0, & m_{BB/+/A+}(0) &= 0, & m_{BB/+/AA}(0) &= 0, & f_{+/+/+}(0) &= 0, \\
f_{+/+/A+}(0) &= 0, & f_{+/+/AA}(0) &= 0, & f_{B+/+/+}(0) &= 0, & f_{B+/+/A+}(0) &= 0.5, & f_{B+/+/AA}(0) &= 0, \\
f_{BB/+/+}(0) &= 0, & f_{BB/+/A+}(0) &= 0, & f_{BB/+/AA}(0) &= 0.
\end{aligned}$$

All numerical simulations of this model were performed using Matlab (version R2019a; The MathWorks Inc., Natick, MA).

## 2.5 Split-Drive Stochastic Model

The deterministic model outlined above was used to (1) estimate relative fitness parameters for each transgenic construct and (2) to provide simple, initial predictions around the outcome of the split drive treatment cages. While useful in planning cage trials and to some extent in analyzing the final outcomes, such models do not account for the stochasticity inherent in such experiments. Thus, we also developed a stochastic model framework capable of providing an estimated range within which we would expect the experimental results to fall. This is largely based on a previously developed model framework used for the study of novel multiplexing approaches for CRISPR-based gene drives<sup>[1]</sup> and has been altered to capture the dynamics of a split drive system. The main basis of this model has been discussed in depth previously and so here we provide only a brief outline of the adjustments made.

Firstly, since the initial model was formulated for the study of multiplexing strategies, it was already capable of managing genetic inheritance across multiple loci. Rather than allowing a free choice of number of loci, here we eliminate this and fix the model to two loci (those for the A and B elements of the split drive).

Perhaps the most important alteration here is the switch from the initial model of embryonic homing to one considering germline homing - as observed in the split drive developed in this study. In the initial model, a homing module altered the assigned genotypes of 'eggs' resulting from each mating pair. To move to a model of germline homing, this homing module was simply moved such that it acts between the selection of parental mating pairs and the assignment of genotypes to the resulting 'eggs' from those mating pairs.

The final, and rather trivial, change required here was in the calculation of transgene carrier frequencies. In the initial model these were calculated in the context of multiplexing approaches where the presence of any gene drive construct was the important factor - thus resulting in a single transgene carrier frequency no matter the multiplex number. However, here it is important to track carrier frequencies of both the B and A elements of the split drive. The relevant calculations were adjusted accordingly, producing separate transgene carrier frequencies for the B and A elements.

As with the deterministic modelling, all stochastic numerical simulations were performed using Matlab (version R2019a; The MathWorks Inc., Natick, MA).

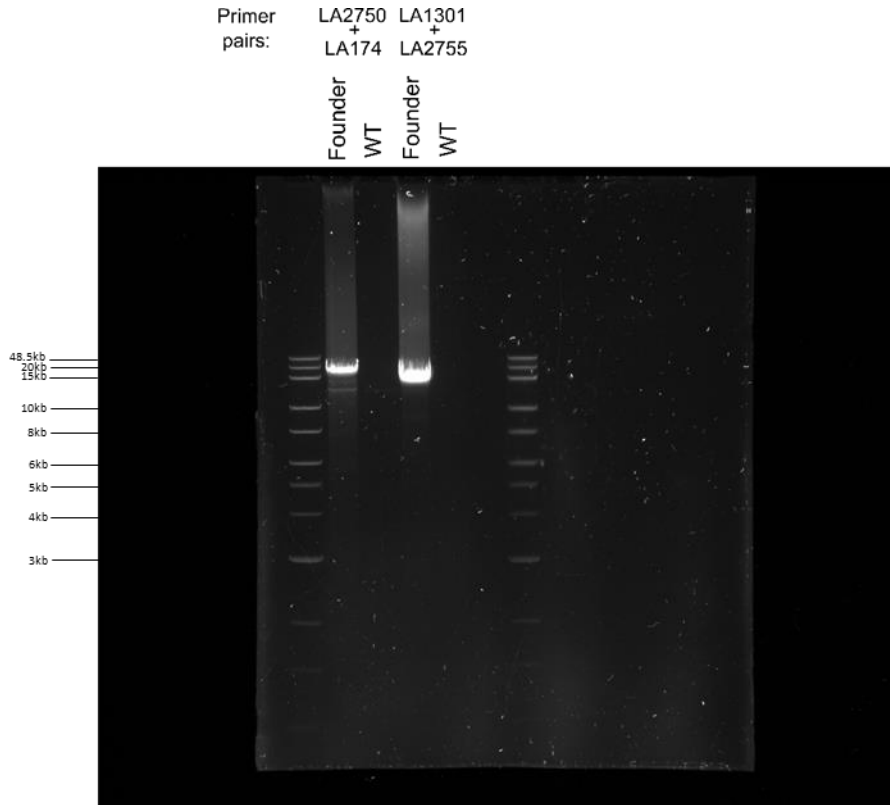

**Fig S4. Confirmation of *kmo*<sup>sgRNAs</sup> integration site by PCR.** Gel electrophoresis of PCRs to confirm the integration site of *kmo*<sup>sgRNAs</sup>. The Quick Load 1kb Extend DNA ladder (NEB) was loaded into the first and last well. Expected amplicons are 10,897bp and 16,306bp.



|                       |                                                                                                            |
|-----------------------|------------------------------------------------------------------------------------------------------------|
| LVP Reference         | GCCATATAATGTGGGCGGCAAGGCGGTGATCATTGGTGATGCGGCACATGCCATGGTTCCCTTCTACGGGCAGGGAATGAATGCCGGATTCGAGGATTGTACTGTG |
| Mutant 1              | GCCATATAATG-----CGGTGATCATTGGTGATGCGGCACATGCCATGGTTCCAT-----GGGAATGAATGCCGGATTCGAGGATTGTACTGTG             |
| (22-bp del, 1-bp sub) |                                                                                                            |
| Mutant 2              | GCCATATAATGTGGGCGGCAAGGCGGTGATCATTGGTG--CGGCACATGCCATGGTTCCCTT-----GGCAGGGAATGAATGCCGGATTCGAGGATTGTACTGTG  |
| (8-bp del)            |                                                                                                            |
| Mutant 3              | GCCATATAATG-----CGGTGATCATTG---CGGCACATGCCATGGTTCCAT-----GGGAATGAATGCCGGATTCGAGGATTGTACTGTG                |
| (28-bp del, 1-bp sub) |                                                                                                            |
| Mutant 4              | GCCATATAATGTGGGCGGCAAGGCGGTGATCATTGGTG--CGGCACATGCCATGGTT-----GGCAGGGAATGAATGCCGGATTCGAGGATTGTACTGTG       |
| (13-bp del)           |                                                                                                            |
| Mutant 5              | GCCATATAATGTGGGCGGCAAGGCGGTGATCATTGGTG--CGGCACATGCCATGGTTCCCTTCTACGGGCAGGGAATGAATGCCGGATTCGAGGATTGTACTGTG  |
| (3-bp del)            |                                                                                                            |
| Mutant 6              | GCCATATAATGTGGGCGGCAAGGCGGTGATCATTGGTG--CGGCACATGCCATGGTTCCCTT-----AGGGAATGAATGCCGGATTCGAGGATTGTACTGTG     |
| (10-bp del)           |                                                                                                            |

**Fig S5. Mutations identified in the *kmo*<sup>-/-</sup> line.** CRISPResso2 analysis of four pooled samples of 5 individuals from the *kmo*<sup>-/-</sup> line revealed six different mutations present in the line.

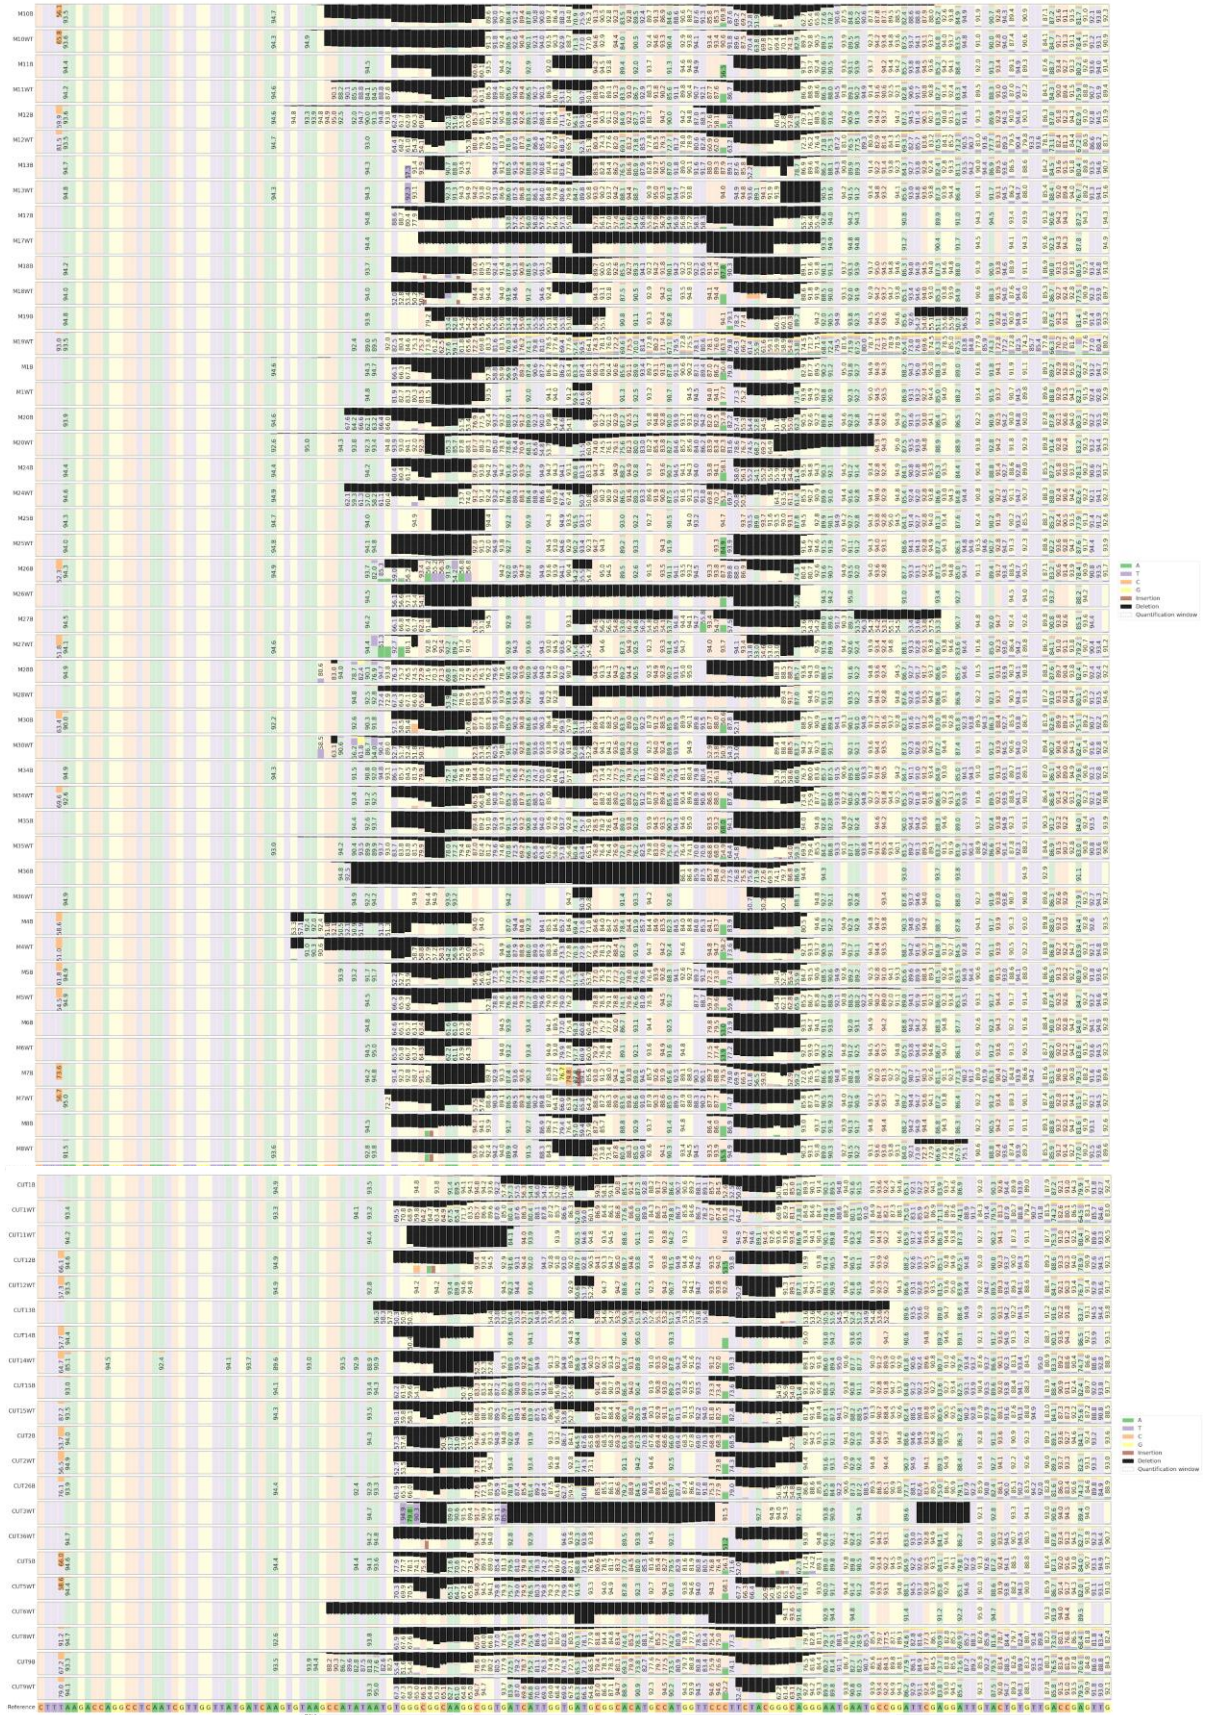

Figure S6. CRISPResso analysis reveals distinct cuts at each target site within individuals.

Alignment profiles for samples presented in Fig 2 of main text. Top section presents the white eyed F<sub>2</sub> progeny of female trans-heterozygotes which did not inherit the *kmo*<sup>sgRNAs</sup>. Bottom section presents the white eyed F<sub>2</sub> progeny of male trans-heterozygotes which did not inherit the *kmo*<sup>sgRNAs</sup>. Each line presents the sequencing results from a single individual and the black bar and number in each position represents the proportion of reads which were non-WT at that nucleotide for that sample. As these individuals have two *kmo* alleles, a fully black bar means that both alleles are mutated at that position, approximately 50% indicates one allele was mutant at that position and any other values indicate mosaicism in that individual. sgRNA targets (not including the PAM) are indicated by grey bars under the reference sequence.

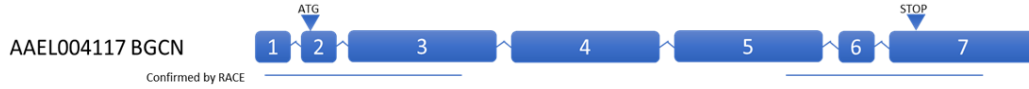

### 5'RACE

|                                                                                                                                 |     |
|---------------------------------------------------------------------------------------------------------------------------------|-----|
| GTTGGTTTCGTGTCGTCGTCACAGACACTTCTTGACAGTCGAGCGAAAAATTTGGTGGGCTCTCCTTCGCAAGGTGCAAAAATCGTCATCTGCGTCTCGAATGGTCAATTTTGTACCGTACGCA... | ex1 |
| ACACACTTCTTGACAGTCGAGCGAAAAATTTGGTGGGCTCTCCTTCGCAAGGTGCAAAAATCGTCATCTGCGTCTCGAATGGTCAATTTTGTACCGTACGCA...                       | 1/4 |
| GACAGTCGAGCGAAAAATTTGGTGGGCTCTCCTTCGCAAGGTGCAAAAATCGTCATCTGCGTCTCGAATGGTCAATTTTGTACCGTACGCA...                                  | 1/4 |
| AGTCGAGCGAAAAATTTGGTGGGCTCTCCTTCGCAAGGTGCAAAAATCGTCATCTGCGTCTCGAATGGTCAATTTTGTACCGTACGCA...                                     | 1/4 |
| TCGAATGGTCAATTTTGTACCGTACGCA...                                                                                                 | 1/4 |

### 3'RACE

|                                                                                                                                         |     |
|-----------------------------------------------------------------------------------------------------------------------------------------|-----|
| AAAGAAAGAGAAAAAATACAAAGGTGCAATGATATTCAAATTTCAACACTGTACATAACGTAATTTTATCACTAAAAGTATGGTAAAAACAAGGTAAAAACATT...//...GTGAAAGATGACAAATTAACATA | ex7 |
| AAAGAAAGAGAAAAAATACAAAGGTGCAATGATATC                                                                                                    | 2/4 |
| AAAGAAAGAGAAAAAATACAAAGGTGCAATGATATTCAAATTTCAACACTGTACATAACGTAATTTTATCACTAAAAGTATGGTAAAAAGAAAAA                                         | 2/4 |

**Fig S7. RACE results for *bgcn*.** Diagram of the *bgcn* gene based on Vectorbase L5 assembly annotations (not to scale). RACE PCR products were cloned into the pJET vector and four clones were sequenced. The top line denotes the start of exon 1 or end of exon 7 as annotated, proceeding lines begin with the first base transcribed (pJET vector and RACE primer sequences trimmed). Right hand column denotes the number of clones with identical sequences.



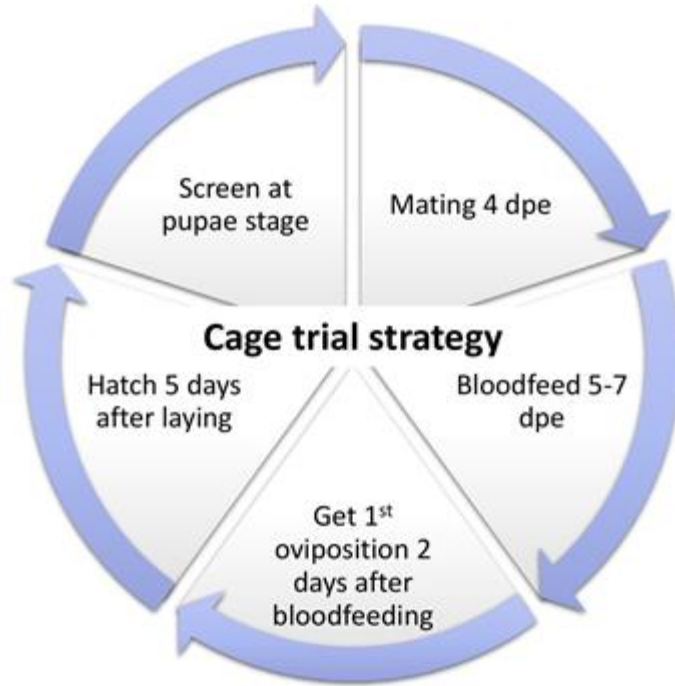

**Fig S8. Diagram of the cage trial strategy.** Steps followed during the 6 generations of the cage trial beginning with the mating of males and females 4 days post eclosion (dpe). Females were allowed to blood feed when they were 5-7 dpe and 2 days later eggs were collected. Five days after oviposition the eggs were hatched in degassed RO (reverse osmosis) water. 250 larvae for each cage were reared under standardized conditions. Finally, the progeny of each generation was screened at pupae stage for fluorescence and eye phenotype.

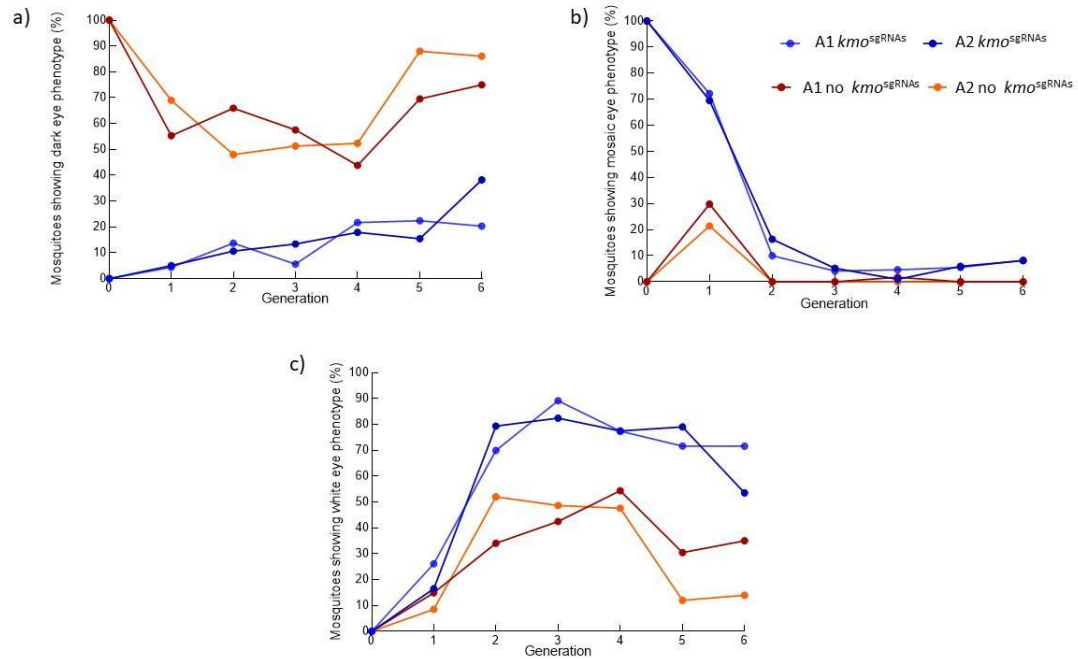

**Figure S9. Eye phenotypes tracked through cage trial.** Proportion of mosquitoes presenting dark eyes (a), mosaic eyes (b) or white eyes (c) screened from each generation of the cage trial experimental cages A1 and A2. Phenotypes have been separated based on the inheritance of the *kmo*<sup>sgRNAs</sup> element. Blue lines indicate those which inherited the *kmo*<sup>sgRNAs</sup> element; these would require disruption of one *kmo* allele to appear as mosaic (somatic disruption) or white eyed (germline disruption inherited from parents). Those which do not carry the *kmo*<sup>sgRNAs</sup> element are indicated in orange and can be either completely non-transgenic or carry the *bgn-Cas9*. In these individuals two alleles of *kmo* would need to be disrupted to present a mosaic or white eyed phenotype.

|              | gRNA447                                                                                                                    | gRNA468 | gRNA499 | gRNA519 |
|--------------|----------------------------------------------------------------------------------------------------------------------------|---------|---------|---------|
| WT           | CAAGTGTAAGCCATATAATGTGGCGGCAAGGCGGTGATCATTGGTGATGCGGCACATGCCATGGTCCCTTCTACGGGCAGGGAATGAATGCCGGATTCGAGGATTGTACTGTGTGACCGAG  |         |         |         |
| F2_1A_A_DE   | CAAGTGTAAGCCATATAATGTGGCGGCAAGGCGGTGATCATTGGTGATGCGGCACATGCCATGGTCCCTTCTACGGGCAGGGAATGAATGCCGGATTCGAGGATTGTACTGTGTGACCGAG  |         |         |         |
| F2_1B_A_DE2  | CAAGTGTAAGCCATATAATGTGGCGGCAAGGCGGTGATCATTGGTGATGCGGCACATGCCATGGTCCCTTCTACGGGCAGGGAATGAATGCCGGATTCGAGGATTGTACTGTGTGACCGAG  |         |         |         |
| F4_1A_A_DE4  | CAAGTGTAAGCCATATAATGTGGCGGCAAGGCGGTGATCATTGGTGATGCGGCACATGCCATGGTCCCTTCTACGGGCAGGGAATGAATGCCGGATTCGAGGATTGTACTGTGTGACCGAG  |         |         |         |
| F4_1B_AB_DE1 | CAAGTGTAAGCCATATAATGTG---GGCAAGGCGGTGATCATTGGTGATGCGGCACATGCCATGGTCCCTTCTACGGGCAGGGAATGAATGCCGGATTCGAGGATTGTACTGTGTGACCGAG |         |         |         |
| F5_1A_A_DE2  | CAAGTGTAAGCCATATAATGTGGCGGCAAGGCGGTGATCATTGGTGATGCGGCACATGCCATGGTCCCTTCTACGGGCAGGGAATGAATGCCGGATTCGAGGATTGTACTGTGTGACCGAG  |         |         |         |
| F5_1A_A_DE1  | CAAGTGTAAGCCATATAATGTG---GGCAAGGCGGTGATCATTGGTGATGCGGCACATGCCATGGTCCCTTCTACGGGCAGGGAATGAATGCCGGATTCGAGGATTGTACTGTGTGACCGAG |         |         |         |

**Fig S10. Mutational profiles of dark-eyed individuals identified in later generations of the cage trial.** Dark eyed samples which also have the *kmo*<sup>sgRNAs</sup> transgene were collected from the cage trial and Sanger sequenced. FX – generation of cage trial, 1Y – replicate experimental cage (A or B), DE - dark eyes, A - *kmo*<sup>sgRNAs</sup>, AB - *kmo*<sup>sgRNAs</sup>;*bgn*-Cas9.

**Table S1. Summary of microinjections performed to establish transgenic lines.**

| Construct                                 | Embryos injected | G <sub>0</sub> survivors (%) | G <sub>1</sub> s screened | Positive G <sub>1</sub> s |
|-------------------------------------------|------------------|------------------------------|---------------------------|---------------------------|
| <i>kmo</i> <sup>sgRNAs</sup><br>(AGG1095) | 1972             | 60 (3%)                      | 6345                      | 46 (3/4 pools)            |
| <i>bgn</i> -Cas9<br>(AGG1207)             | 1152             | 129 (11.2%)                  | 2238                      | 38 (5/6 pools)            |



**Table S2. Homozygous viability of *bgcn*-Cas9 line.**

| Cross             | No. progeny inheriting <i>bgcn</i> -Cas9 (%) | No. WT progeny | TOTAL screened | Chi-square value | P value* |
|-------------------|----------------------------------------------|----------------|----------------|------------------|----------|
| <i>bgcn</i> -Cas9 | 202 (74%)                                    | 69             | 271            | 0.0196           | 0.8886   |

WT: wild type

\*Chi-square test (df.1,  $p < 0.0001$ ) for deviation from expected Mendelian inheritance rate.

**Table S3. F<sub>1</sub> progeny from the *bgcn-Cas9* x *kmo*<sup>sgRNAs</sup> F<sub>0</sub> crosses.**

| F <sub>0</sub> Cross (female x male)             | No. F <sub>1</sub> positive for <i>kmo</i> <sup>sgRNAs</sup> (mosaics) | No. F <sub>1</sub> positive for <i>kmo</i> <sup>sgRNAs</sup> ; <i>bgcn-Cas9</i> (mosaics) | No. F <sub>1</sub> positive for <i>bgcn-Cas9</i> (mosaics) | No. WT F <sub>1</sub> (mosaics) | Total F <sub>1</sub> scored |
|--------------------------------------------------|------------------------------------------------------------------------|-------------------------------------------------------------------------------------------|------------------------------------------------------------|---------------------------------|-----------------------------|
| <i>bgcn-Cas9D</i> x <i>kmo</i> <sup>sgRNAs</sup> | 29 (17)                                                                | 34 (27)                                                                                   | 23 (0)                                                     | 29 (0)                          | 115 (44)                    |

WT: wild type

**Table S4. Inheritance assessments of progeny from *kmo*<sup>sgRNAs</sup>; *bgn-Cas9* transheterozygous F<sub>1</sub>.**

| F <sub>1</sub> Cross (female x male)                         | No. F <sub>2</sub> positive for <i>kmo</i> <sup>sgRNAs</sup> | No. F <sub>2</sub> positive for <i>kmo</i> <sup>sgRNAs</sup> ; <i>bgn-Cas9</i> | No. F <sub>2</sub> positive for <i>bgn-Cas9</i> | No. WT F <sub>2</sub> | Total F <sub>2</sub> scored | Total F <sub>2</sub> inheriting <i>kmo</i> <sup>sgRNAs</sup> (%) | Total F <sub>2</sub> inheriting <i>bgn-Cas9</i> (%) |
|--------------------------------------------------------------|--------------------------------------------------------------|--------------------------------------------------------------------------------|-------------------------------------------------|-----------------------|-----------------------------|------------------------------------------------------------------|-----------------------------------------------------|
| WT x <i>kmo</i> <sup>sgRNAs</sup> ; <i>bgn-Cas9D</i> (exp 1) | 33                                                           | 44                                                                             | 20                                              | 16                    | 113                         | 77 (68.1)                                                        | 64 (56.6)                                           |
| WT x <i>kmo</i> <sup>sgRNAs</sup> ; <i>bgn-Cas9D</i> (exp 2) | 431                                                          | 367                                                                            | 155                                             | 618                   | 1571                        | 798 (50.8)                                                       | 522 (33.2)                                          |
| WT x <i>kmo</i> <sup>sgRNAs</sup> ; <i>bgn-Cas9D</i> (exp 3) | 213                                                          | 198                                                                            | 154                                             | 190                   | 755                         | 411 (54.4)                                                       | 352 (46.7)                                          |
| <i>kmo</i> <sup>sgRNAs</sup> ; <i>bgn-Cas9D</i> x WT (exp 1) | 122                                                          | 123                                                                            | 47                                              | 26                    | 318                         | 245 (77)                                                         | 170 (53.45)                                         |
| <i>kmo</i> <sup>sgRNAs</sup> ; <i>bgn-Cas9D</i> x WT (exp 2) | 66                                                           | 45                                                                             | 17                                              | 19                    | 147                         | 111 (75.5)                                                       | 62 (42.2)                                           |
| <i>kmo</i> <sup>sgRNAs</sup> ; <i>bgn-Cas9D</i> x WT (exp 3) | 157                                                          | 162                                                                            | 43                                              | 46                    | 408                         | 319 (78.7)                                                       | 205 (50.2)                                          |

WT: wild type

**Table S5. Mosaicism assessments of progeny from *kmo*<sup>sgRNAs</sup>; *bgn-Cas9* trans-heterozygous F<sub>1</sub>.**

| F <sub>1</sub> Cross (female x male)                         | No. mosaics in the F <sub>2</sub> positive for <i>kmo</i> <sup>sgRNAs</sup> (%) | No. mosaics in the F <sub>2</sub> positive for <i>kmo</i> <sup>sgRNAs</sup> ; <i>bgn-Cas9</i> (%) | No. mosaics in the F <sub>2</sub> positive for <i>bgn-Cas9</i> (%) | No. mosaics in the WT F <sub>2</sub> (%) |
|--------------------------------------------------------------|---------------------------------------------------------------------------------|---------------------------------------------------------------------------------------------------|--------------------------------------------------------------------|------------------------------------------|
| WT x <i>kmo</i> <sup>sgRNAs</sup> ; <i>bgn-Cas9D</i> (exp 1) | 2 (6)                                                                           | 20 (45.5)                                                                                         | 0                                                                  | 0                                        |
| WT x <i>kmo</i> <sup>sgRNAs</sup> ; <i>bgn-Cas9D</i> (exp 2) | 104 (21.1)                                                                      | 235 (64)                                                                                          | 0                                                                  | 0                                        |
| WT x <i>kmo</i> <sup>sgRNAs</sup> ; <i>bgn-Cas9D</i> (exp 3) | 25 (11.7)                                                                       | 56 (28.3)                                                                                         | 0                                                                  | 0                                        |
| <i>kmo</i> <sup>sgRNAs</sup> ; <i>bgn-Cas9D</i> x WT (exp 1) | 76 (62.3)                                                                       | 87 (71)                                                                                           | 9 (19.1)                                                           | 1 (3.8)                                  |
| <i>kmo</i> <sup>sgRNAs</sup> ; <i>bgn-Cas9D</i> x WT (exp 2) | 65 (98.5)                                                                       | 45 (100)                                                                                          | 3 (17.6)                                                           | 3 (15.8)                                 |
| <i>kmo</i> <sup>sgRNAs</sup> ; <i>bgn-Cas9D</i> x WT (exp 3) | 148 (94.3)                                                                      | 157 (97)                                                                                          | 19 (44.2)                                                          | 15 (32.6)                                |

WT: wild type

**Table S6. G-test result data for F<sub>2</sub> rates of inheritance.** This is a maximum likelihood significance test. Individual crosses are analyzed for significant deviation from Mendelian inheritance. Individual crosses are pooled according to treatment for an overall Goodness of fit G-value and scored for whether there is heterogeneity among treatments.

| Line             | df | G – goodness of fit |         | P-value   |                       |         |
|------------------|----|---------------------|---------|-----------|-----------------------|---------|
| Male - Mosaics   | 1  | 15.221              |         | 0.000096* |                       |         |
| Female - Mosaics | 1  | 98.201              |         | 3.78E-23* |                       |         |
| Pooled crosses   | df | G – goodness of fit | P-value | df        | Heterogeneity G-value | P-value |
| D Line           | 1  | 110.03              | 2.2E-16 | 2         | 3.39                  | 0.066   |

**Table S7. Model summaries for estimates of homing and cutting rates from *kmo*<sup>sgRNAs</sup>; *bgn* Cas9 mosquitoes crossed to WT mosquitoes.** Odds coefficients, and 95% confidence intervals, and significance values taken from a binomial glm with 'logit' link. Two models compare the calculated odds of observing *kmo*<sup>sgRNAs</sup> inheritance and white eyes.

| <i>Predictors</i> | <i>kmo</i> <sup>sgRNAs</sup> inheritance |               |          | white eyes  |               |          |
|-------------------|------------------------------------------|---------------|----------|-------------|---------------|----------|
|                   | <i>Odds</i>                              | <i>95% CI</i> | <i>p</i> | <i>Odds</i> | <i>95% CI</i> | <i>p</i> |
| (Intercept)       | 4.31                                     | 3.66 – 5.09   | <0.001   | 4.90        | 4.14 – 5.80   | <0.001   |
| N                 | 59                                       |               |          | 53          |               |          |

**Table S8. Summary of the cutting assay screening from *kmo*<sup>sgRNAs</sup>; *bagn* Cas9 mosquitoes crossed to *kmo*<sup>-</sup> mosquitoes.**

| Cross<br>(female x<br>male)                                                            | Replicate | No. F <sub>2</sub><br>positive for<br><i>kmo</i> <sup>sgRNAs</sup> | No. F <sub>2</sub><br>positive for<br><i>kmo</i> <sup>sgRNAs</sup> ;<br><i>bagn</i> -Cas9 | No. F <sub>2</sub><br>positive<br>for <i>bagn</i> -<br>Cas9 | No. WT<br>F <sub>2</sub> | Total F <sub>2</sub><br>scored | Total F <sub>2</sub><br>inheriting<br><i>kmo</i> <sup>sgRNAs</sup> | Total F <sub>2</sub> non-<br>inheriting<br><i>kmo</i> <sup>sgRNAs</sup> | Total F <sub>2</sub> non-<br>inheriting<br><i>kmo</i> <sup>sgRNAs</sup> with<br>WE |
|----------------------------------------------------------------------------------------|-----------|--------------------------------------------------------------------|-------------------------------------------------------------------------------------------|-------------------------------------------------------------|--------------------------|--------------------------------|--------------------------------------------------------------------|-------------------------------------------------------------------------|------------------------------------------------------------------------------------|
| <i>(kmo</i> <sup>sgRNAs</sup> ;<br><i>bagn</i> -<br>Cas9) x<br><i>kmo</i> <sup>-</sup> | 1         | 10                                                                 | 17                                                                                        | 4                                                           | 4                        | 35                             | 27                                                                 | 8                                                                       | 8                                                                                  |
|                                                                                        | 2         | 16                                                                 | 6                                                                                         | 8                                                           | 12                       | 42                             | 22                                                                 | 20                                                                      | 20                                                                                 |
|                                                                                        | 3         | 12                                                                 | 7                                                                                         | 14                                                          | 16                       | 49                             | 19                                                                 | 30                                                                      | 30                                                                                 |
|                                                                                        | 4         | 23                                                                 | 22                                                                                        | 13                                                          | 8                        | 66                             | 45                                                                 | 21                                                                      | 5                                                                                  |
|                                                                                        | 5         | 9                                                                  | 11                                                                                        | 1                                                           | 7                        | 28                             | 20                                                                 | 8                                                                       | 8                                                                                  |
|                                                                                        | 6         | 22                                                                 | 35                                                                                        | 6                                                           | 6                        | 69                             | 57                                                                 | 12                                                                      | 12                                                                                 |
|                                                                                        | 7         | 6                                                                  | 16                                                                                        | 10                                                          | 3                        | 35                             | 22                                                                 | 13                                                                      | 13                                                                                 |
|                                                                                        | 8         | 26                                                                 | 24                                                                                        | 17                                                          | 10                       | 77                             | 50                                                                 | 27                                                                      | 13                                                                                 |
|                                                                                        | 9         | 13                                                                 | 30                                                                                        | 14                                                          | 21                       | 78                             | 43                                                                 | 35                                                                      | 30                                                                                 |
|                                                                                        | 10        | 33                                                                 | 38                                                                                        | 4                                                           | 1                        | 76                             | 71                                                                 | 5                                                                       | 5                                                                                  |
|                                                                                        | 12        | 25                                                                 | 24                                                                                        | 3                                                           | 1                        | 53                             | 49                                                                 | 4                                                                       | 4                                                                                  |
|                                                                                        | 13        | 43                                                                 | 25                                                                                        | 12                                                          | 11                       | 91                             | 68                                                                 | 23                                                                      | 20                                                                                 |
|                                                                                        | 14        | 22                                                                 | 20                                                                                        | 2                                                           | 3                        | 47                             | 42                                                                 | 5                                                                       | 4                                                                                  |
|                                                                                        | 16        | 16                                                                 | 19                                                                                        | 1                                                           | 0                        | 36                             | 35                                                                 | 1                                                                       | 0                                                                                  |
|                                                                                        | 17        | 21                                                                 | 18                                                                                        | 8                                                           | 14                       | 61                             | 39                                                                 | 22                                                                      | 22                                                                                 |
|                                                                                        | 18        | 4                                                                  | 10                                                                                        | 1                                                           | 4                        | 19                             | 14                                                                 | 5                                                                       | 5                                                                                  |
|                                                                                        | 19        | 8                                                                  | 6                                                                                         | 2                                                           | 2                        | 18                             | 14                                                                 | 4                                                                       | 4                                                                                  |
|                                                                                        | 20        | 16                                                                 | 14                                                                                        | 2                                                           | 7                        | 39                             | 30                                                                 | 9                                                                       | 9                                                                                  |
|                                                                                        | 21        | 12                                                                 | 12                                                                                        | 1                                                           | 3                        | 28                             | 24                                                                 | 4                                                                       | 4                                                                                  |

|                                                                                           |    |    |    |    |    |     |     |    |    |
|-------------------------------------------------------------------------------------------|----|----|----|----|----|-----|-----|----|----|
|                                                                                           | 22 | 5  | 7  | 3  | 9  | 24  | 12  | 12 | 12 |
|                                                                                           | 23 | 21 | 13 | 8  | 6  | 48  | 34  | 14 | 12 |
|                                                                                           | 24 | 4  | 7  | 10 | 3  | 24  | 11  | 13 | 9  |
|                                                                                           | 25 | 31 | 35 | 4  | 7  | 77  | 66  | 11 | 6  |
|                                                                                           | 26 | 9  | 4  | 1  | 1  | 15  | 13  | 2  | 2  |
| <i>kmo</i> <sup>-/-</sup> x<br>( <i>kmo</i> <sup>sgRNAs</sup> ;<br><i>bcbn</i> -<br>Cas9) | 1  | 19 | 18 | 14 | 26 | 77  | 37  | 40 | 9  |
|                                                                                           | 2  | 14 | 7  | 10 | 6  | 37  | 21  | 16 | 15 |
|                                                                                           | 3  | 56 | 63 | 1  | 2  | 122 | 119 | 3  | 0  |
|                                                                                           | 4  | 10 | 17 | 17 | 8  | 52  | 27  | 25 | 15 |
|                                                                                           | 5  | 19 | 10 | 8  | 12 | 49  | 29  | 20 | 1  |
|                                                                                           | 6  | 27 | 20 | 22 | 20 | 89  | 47  | 42 | 7  |
|                                                                                           | 7  | 27 | 20 | 1  | 1  | 49  | 47  | 2  | 2  |
|                                                                                           | 8  | 16 | 22 | 18 | 20 | 76  | 38  | 38 | 6  |
|                                                                                           | 9  | 44 | 50 | 0  | 2  | 96  | 94  | 2  | 2  |
|                                                                                           | 10 | 19 | 27 | 18 | 9  | 73  | 46  | 27 | 7  |
|                                                                                           | 11 | 27 | 30 | 9  | 11 | 77  | 57  | 20 | 14 |
|                                                                                           | 12 | 30 | 26 | 23 | 29 | 108 | 56  | 52 | 2  |
|                                                                                           | 13 | 24 | 29 | 10 | 9  | 72  | 53  | 19 | 19 |
|                                                                                           | 14 | 19 | 11 | 18 | 15 | 63  | 40  | 33 | 8  |
|                                                                                           | 15 | 11 | 15 | 13 | 13 | 52  | 26  | 26 | 0  |
|                                                                                           | 16 | 2  | 3  | 1  | 3  | 9   | 5   | 4  | 1  |
|                                                                                           | 17 | 7  | 4  | 3  | 2  | 16  | 11  | 5  | 4  |



|  |    |    |    |   |    |    |    |    |    |
|--|----|----|----|---|----|----|----|----|----|
|  | 18 | 2  | 5  | 5 | 2  | 14 | 7  | 7  | 1  |
|  | 19 | 34 | 30 | 0 | 1  | 65 | 64 | 1  | 1  |
|  | 20 | 50 | 33 | 0 | 0  | 83 | 83 | 0  | 0  |
|  | 21 | 20 | 13 | 0 | 0  | 33 | 33 | 0  | 0  |
|  | 22 | 16 | 14 | 6 | 10 | 46 | 30 | 16 | 16 |

WT: wild type; WE: white-eyed

**Table S9. Full model summaries for estimates of homing and cutting rates from *kmo*<sup>sgRNAs</sup>; *bagn* Cas9 mosquitoes crossed to *kmo*<sup>-/-</sup> mosquitoes.** Log-odds and 95% confidence intervals, and significance values are taken from a binomial glm or glmm with 'logit' link using sex of the parent as a fixed effect. Mixed-effects models included replicate as a nested random factor within the sex of the parent.

|                                                                                       | 1.Mixed-effects model<br>Homing rates | 2.Mixed-effects model<br>Combined male & female homing rates | 3.Mixed-effects model<br>Cutting rates | 4.Pooled model for<br>Homing rates | 5.Pooled model for<br>Cutting rates |
|---------------------------------------------------------------------------------------|---------------------------------------|--------------------------------------------------------------|----------------------------------------|------------------------------------|-------------------------------------|
| <i>Predictors</i>                                                                     | <i>Log-Odds</i>                       | <i>Log-Odds</i>                                              | <i>Log-Odds</i>                        | <i>Log-Odds</i>                    | <i>Log-Odds</i>                     |
| (Intercept)                                                                           | 1.22 ***<br>(0.70 – 1.74)             | 1.18 ***<br>(0.82 – 1.53)                                    | 2.65 ***<br>(1.57 – 3.72)              | 0.92 ***<br>(0.80 – 1.04)          | 1.45 ***<br>(1.32 – 1.59)           |
| <i>kmo</i> <sup>sgRNAs</sup> ;<br><i>bagn</i> -Cas9♀<br>x <i>kmo</i> <sup>-/-</sup> ♂ | -0.09<br>(-0.80 – 0.63)               | N/A                                                          | 2.35 **<br>(0.77 – 3.93)               | 0.07<br>(-0.10 – 0.25)             | 1.61 ***<br>(1.30 – 1.93)           |
| <b>Random Effects</b>                                                                 |                                       |                                                              |                                        |                                    |                                     |
| $\sigma^2$                                                                            | 4.64                                  | 4.64                                                         | 8.38                                   |                                    |                                     |
| T00                                                                                   | 1.35 Replicate:<br>Cross              | 1.35 Replicate:<br>Cross                                     | 5.09 Replicate:<br>Cross               |                                    |                                     |
|                                                                                       | 0.00 Cross                            | 0.00 Cross                                                   | 0.00 Cross                             |                                    |                                     |
| N                                                                                     | 26 Replicate                          | 26 Replicate                                                 | 26 Replicate                           |                                    |                                     |
|                                                                                       | 2 Cross                               | 2 Cross                                                      | 2 Cross                                |                                    |                                     |
| Observations                                                                          | 46                                    | 46                                                           | 46                                     | 46                                 | 46                                  |
| Marginal R <sup>2</sup> /<br>Conditional<br>R <sup>2</sup>                            | 0.000 / NA                            | 0.000/<br>NA                                                 | 0.144 / NA                             | 0.007                              | 0.073                               |

\*  $p < 0.05$  \*\*  $p < 0.01$  \*\*\*  $p < 0.001$

**Table S10. Number of reads for each sample analysed by CRISPResso2.**

| Sample name  | READS IN INPUTS | READS AFTER PREPROCESSING | READS ALIGNED |
|--------------|-----------------|---------------------------|---------------|
| LVP1         | 15463           | 2630                      | 2630          |
| LVP2         | 12663           | 2751                      | 2751          |
| LVP3         | 19848           | 4501                      | 4500          |
| kmoKO5m      | 199913          | 52857                     | 52857         |
| kmoKO8m      | 23977           | 5316                      | 5316          |
| kmoKO5f      | 173303          | 37919                     | 37919         |
| kmoKO6f      | 16144           | 3932                      | 3932          |
| F2_1A_AB_ME1 | 74605           | 13875                     | 13646         |
| F2_1A_AB_ME2 | 37813           | 6430                      | 6277          |
| F2_1A_AB_WE1 | 47942           | 6769                      | 6160          |
| F2_1A_AB_WE2 | 27971           | 4134                      | 3720          |
| F2_1A_A_WE   | 39313           | 7238                      | 7234          |
| F2_1A_B_WE   | 49228           | 9175                      | 9175          |
| F2_1A_WT_WE1 | 46068           | 10926                     | 10926         |
| F2_1A_WT_WE2 | 46004           | 9150                      | 9150          |
| F2_1B_AB_ME1 | 9424            | 1749                      | 1666          |
| F2_1B_AB_ME2 | 42933           | 7155                      | 6875          |
| F2_1B_AB_ME3 | 37963           | 4410                      | 4313          |
| F2_1B_A_WE1  | 4608            | 747                       | 747           |
| F2_1B_WT_WE1 | 9133            | 1584                      | 1584          |
| F4_1A_AB_ME  | 44162           | 7903                      | 7735          |
| F4_1A_AB_WE* | 58              | 2                         | 2             |
| F4_1A_A_WE   | 2666            | 621                       | 621           |
| F4_1A_B_WE1  | 7083            | 1228                      | 1227          |
| F4_1A_B_WE2  | 149540          | 34140                     | 34140         |
| F4_1A_B_WE3  | 63642           | 14201                     | 14201         |
| F4_1A_WT_WE1 | 62630           | 6359                      | 6359          |
| F4_1A_WT_WE2 | 12980           | 2176                      | 2176          |
| F4_1B_AB_WE* | 172             | 9                         | 9             |
| F4_1B_A_WE   | 47872           | 8480                      | 8480          |
| F5_1A_AB_ME1 | 1171441         | 193255                    | 190179        |
| F5_1A_AB_ME2 | 35357           | 7009                      | 6884          |
| F5_1A_AB_ME3 | 51823           | 11005                     | 11005         |
| F5_1A_AB_ME4 | 31550           | 1230                      | 1221          |
| F5_1A_AB_ME5 | 27683           | 5556                      | 5457          |
| F5_1A_AB_ME6 | 38129           | 5974                      | 5806          |
| F5_1A_AB_WE1 | 41588           | 3307                      | 3228          |
| F5_1A_AB_WE2 | 24837           | 7881                      | 7832          |
| F5_1A_AB_WE3 | 47028           | 7907                      | 7907          |
| F5_1A_AB_WE4 | 40179           | 7986                      | 7332          |

|              |        |        |        |
|--------------|--------|--------|--------|
| F5_1A_AB_WE5 | 43165  | 5759   | 5759   |
| F5_1A_A_ME1  | 29189  | 6404   | 6385   |
| F5_1A_A_WE1  | 52947  | 12810  | 12810  |
| F5_1A_A_WE2  | 27834  | 6719   | 6719   |
| F5_1A_A_WE4  | 30055  | 5212   | 5212   |
| F5_1A_A_WE5  | 23860  | 6650   | 6650   |
| F5_1A_B_WE   | 54126  | 9830   | 9537   |
| F5_1A_WT_WE1 | 64447  | 13065  | 12523  |
| F5_1A_WT_WE2 | 24712  | 6770   | 6770   |
| F5_1A_WT_WE3 | 55185  | 13751  | 13751  |
| F5_1A_WT_WE4 | 34089  | 9304   | 9304   |
| F5_1A_WT_WE5 | 25393  | 6001   | 6001   |
| F5_1B_AB_WE1 | 523    | 31     | 30     |
| F5_1B_AB_WE3 | 13449  | 2615   | 2567   |
| F5_1B_A_WE2  | 28242  | 8018   | 8018   |
| F5_1B_A_WE3* | 4120   | 1      | 1      |
| F5_1B_A_WE4* | 406    | 3      | 3      |
| F5_1B_A_WE7  | 21592  | 4889   | 4889   |
| F2_1A_AB_DE2 | 13784  | 3102   | 3068   |
| F2_1A_AB_DE3 | 29718  | 7571   | 7571   |
| F2_1A_A_DE   | 45674  | 12556  | 12556  |
| F2_1B_AB_DE  | 48354  | 10148  | 10148  |
| F2_1B_A_DE1  | 10038  | 2449   | 2449   |
| F2_1B_A_DE2  | 9314   | 1713   | 1713   |
| F4_1A_AB_DE  | 49865  | 14173  | 14173  |
| F4_1A_AB_DE1 | 9244   | 2540   | 2519   |
| F4_1A_A_DE1  | 53557  | 15612  | 15612  |
| F4_1A_A_DE2  | 42279  | 12024  | 12019  |
| F4_1A_A_DE3  | 3609   | 984    | 984    |
| F4_1A_A_DE4  | 4205   | 1009   | 1009   |
| F4_1B_AB_DE1 | 48594  | 10070  | 10070  |
| F4_1B_AB_DE2 | 16930  | 2266   | 2249   |
| F4_1B_AB_DE3 | 11432  | 1860   | 1860   |
| F4_1B_A_DE1  | 5616   | 1142   | 1142   |
| F4_1B_A_DE2  | 7598   | 1240   | 1240   |
| F4_1B_A_DE3  | 976398 | 192699 | 192698 |
| F5_1A_AB_DE  | 25278  | 5872   | 5872   |
| F5_1A_A_DE   | 37830  | 9026   | 9015   |
| F5_1A_A_DE1  | 28492  | 8570   | 8570   |
| F5_1A_A_DE2  | 55262  | 13619  | 13619  |
| F5_1A_A_DE3  | 30359  | 7416   | 7371   |
| F5_1A_A_DE4  | 40626  | 6961   | 6961   |

|              |        |        |        |
|--------------|--------|--------|--------|
| F5_1A_A_DE5  | 17880  | 3881   | 3877   |
| F5_1B_AB_DE  | 84081  | 21346  | 21303  |
| F5_1B_AB_DE1 | 23633  | 5324   | 5250   |
| F5_1B_AB_DE2 | 50624  | 13251  | 13215  |
| F5_1B_AB_DE3 | 19088  | 4849   | 4841   |
| F5_1B_AB_DE4 | 37346  | 9261   | 9261   |
| F5_1B_AB_DE5 | 16791  | 3683   | 3683   |
| F5_1B_AB_DE6 | 12038  | 2988   | 2988   |
| F5_1B_AB_DE7 | 19171  | 4166   | 4166   |
| F5_1B_AB_DE8 | 55450  | 15794  | 15741  |
| F5_1B_A_DE1  | 18303  | 3671   | 3671   |
| F5_1B_A_DE2  | 57524  | 15808  | 15801  |
| F5_1B_A_DE3  | 25455  | 6488   | 6488   |
| F5_1B_A_DE4  | 52922  | 12427  | 12427  |
| F5_1B_A_DE5  | 22987  | 6059   | 6059   |
| F5_1B_A_DE6  | 31165  | 8567   | 8567   |
| F5_1B_A_DE7  | 23657  | 4064   | 4064   |
| CUT1B        | 311819 | 295309 | 287050 |
| CUT1WT       | 9121   | 8115   | 7761   |
| CUT11WT      | 172587 | 163497 | 161784 |
| CUT12B       | 5564   | 5058   | 5016   |
| CUT12WT      | 5323   | 4950   | 4931   |
| CUT13B       | 4316   | 3818   | 2851   |
| CUT14B       | 123063 | 114199 | 113639 |
| CUT14WT      | 35387  | 29274  | 28901  |
| CUT15B       | 6888   | 6089   | 5964   |
| CUT15WT      | 2970   | 2467   | 1829   |
| CUT2B        | 733952 | 676303 | 443104 |
| CUT2WT       | 651202 | 607611 | 373922 |
| CUT26B       | 1327   | 1093   | 1001   |
| CUT3WT       | 190427 | 181546 | 171822 |
| CUT36WT      | 8457   | 7931   | 7887   |
| CUT5B        | 373302 | 350230 | 325060 |
| CUT5WT       | 578866 | 544684 | 541175 |
| CUT6WT       | 313782 | 297736 | 246368 |
| CUT8WT       | 768    | 555    | 512    |
| CUT9B        | 9769   | 8307   | 6847   |
| CUT9WT       | 192625 | 179432 | 135865 |
| M10B         | 38122  | 34545  | 32059  |
| M10WT        | 227889 | 210591 | 205562 |

|       |        |        |        |
|-------|--------|--------|--------|
| M11B  | 164421 | 153763 | 152588 |
| M11WT | 13643  | 12694  | 12108  |
| M12B  | 324273 | 298727 | 295128 |
| M12WT | 12670  | 11204  | 10008  |
| M13B  | 245844 | 229285 | 220796 |
| M13WT | 239608 | 224501 | 222916 |
| M17B  | 221539 | 207650 | 194190 |
| M17WT | 196989 | 183764 | 168176 |
| M18B  | 187661 | 174325 | 168967 |
| M18WT | 261646 | 244268 | 242167 |
| M19B  | 76069  | 72520  | 71966  |
| M19WT | 657    | 557    | 526    |
| M1B   | 351130 | 336510 | 328527 |
| M1WT  | 358939 | 342271 | 340391 |
| M20B  | 99314  | 94598  | 93290  |
| M20WT | 72898  | 68799  | 64933  |
| M24B  | 30620  | 28204  | 27931  |
| M24WT | 15760  | 14957  | 14048  |
| M25B  | 54573  | 50462  | 50061  |
| M25WT | 39665  | 35663  | 35174  |
| M26B  | 75529  | 71769  | 70993  |
| M26WT | 62770  | 55381  | 51822  |
| M27B  | 84453  | 80544  | 77440  |
| M27WT | 53079  | 44641  | 44033  |
| M28B  | 5913   | 5381   | 5308   |
| M28WT | 6669   | 5558   | 5405   |
| M30B  | 5122   | 4476   | 4341   |
| M30WT | 5331   | 4915   | 4739   |
| M34B  | 3613   | 3166   | 2925   |
| M34WT | 3424   | 3087   | 2961   |
| M35B  | 6035   | 5358   | 5178   |
| M35WT | 5530   | 5068   | 4610   |
| M36B  | 195069 | 184515 | 166119 |
| M36WT | 226049 | 195760 | 193451 |
| M4B   | 198059 | 187571 | 183076 |
| M4WT  | 317077 | 300509 | 296339 |
| M5B   | 18222  | 16773  | 16292  |
| M5WT  | 383071 | 361326 | 355510 |
| M6B   | 89201  | 83877  | 83267  |

|      |        |        |        |
|------|--------|--------|--------|
| M6WT | 165649 | 155881 | 155132 |
| M7B  | 58524  | 54452  | 52348  |
| M7WT | 296430 | 277980 | 270906 |
| M8B  | 288665 | 272643 | 271207 |
| M8WT | 140912 | 126723 | 124851 |

\*these samples were excluded from further analyses due to low number of sequencing reads (<10)

**Table S11. Complete primer list.**

| Name   | Sequence (5'-3')                                                                          |
|--------|-------------------------------------------------------------------------------------------|
| LA174  | AGGATGTCTGAAGGAGAAGGCCAGG                                                                 |
| LA182  | GGCGACTGAGATGTCCTAAATGCAC                                                                 |
| LA184  | CAGACCGATAAAACACATGCGTCA                                                                  |
| LA186  | CAGCGACGGATTTCGCGCTATTTAG                                                                 |
| LA187  | GTGTAGCGTGAAGACGACAGAA                                                                    |
| LA518  | GCCTCCTGAATCCAAATATGCTTGC                                                                 |
| LA924  | GCACCGAATCGGTGCCTGCCTTCCGGCATGATAACGGACTTGCCTTATTCCAA<br>CTTGTCGTGCTGTTCCCAGCAGACTCTGGAAC |
| LA925  | GAAATTAATACGACTCACTATAGGGCCATATAATGTGGGCGGCAGTTCCAGAG<br>TCGTGCTGG                        |
| LA926  | GAAATTAATACGACTCACTATAGGCACAGTACAATCCTCGAATCGTTCCAGAGT<br>CGTGCTGG                        |
| LA1074 | CGGCCATTTACGATCGGTGGGTTTGG                                                                |
| LA1075 | GCGTTGTTCTGCGGTCCCCTGTTTTTG                                                               |
| LA1076 | CTGGCCAATGTTACTGTGGCCGGCG                                                                 |
| LA1275 | TTATGATGATCGCCCTGCC                                                                       |
| LA1301 | TGGCCTTCTCCTTCGACATCCTGT                                                                  |
| LA1352 | GATTACGCCAAGCTTGATGGTTCCTCATGACCTGCGCCGC                                                  |
| LA1725 | TTTTGCGGCCGCCAACGTTGGGGCGTCATAAG                                                          |
| LA1726 | TTTTCTCGAGGTTGGAGCTGTTTTCGTT                                                              |
| LA1737 | TTTTTTAATTAATCTTGATACGTCTTTCATCAAGC                                                       |
| LA1738 | TTTTGCGATCGCCCTCGAGCTATGTTTAATTTGTCATTCTTTCACATTG                                         |
| LA2750 | TAAGTGTTTCGCAGACGGCTTCA                                                                   |
| LA2755 | ACGCATGTGGGAGAACGATA                                                                      |



**Table S12. Closest potential off-targets as determined by CHOPCHOP, lowercase nucleotides indicate mismatches**

| Target | Sequence                | Potential off targets                                                                                                                |
|--------|-------------------------|--------------------------------------------------------------------------------------------------------------------------------------|
| kmo447 | GCCATATAATGTGGGCGGCAAGG | none                                                                                                                                 |
| kmo468 | GGCGGTGATCATTGGTGATGCGG | GGCcGTtgTCATTGGTGATGGGG<br>CCGgATCcaCAATGATCACCGCC<br>CCAgATCACCAATGATCAgtGCC<br>CCCCAcCcCCAATGATCACCCcCC<br>GGCGGaGATCtTTGcTGATGTGG |
| kmo499 | GGTTCCTTCTACGGGCAGGG    | GGTaCCCTTCTgaGGGCAGGG                                                                                                                |
| kmo519 | CACAGTACAATCCTCGAATCCGG | CACgccACAATCtTCGtATCGGG                                                                                                              |

## References

1. M.P. Edgington, T. Harvey-Samuel, L. Alphey, Population-level multiplexing: A promising strategy to manage the evolution of resistance against gene drives targeting a neutral locus. *Evol. Appl.* **13**, 1939–1948 (2020).
