# Supplementary material for: A multiplexed, confinable CRISPR/Cas9 gene drive can propagate in caged Aedes aegypti populations
Source: PubMed Central journal article supplement (PMC10810878; doi:10.1038/s41467-024-44956-2), 2024-01-25
Supplement: 41467_2024_44956_MOESM4_ESM.pdf [file 41467_2024_44956_MOESM4_ESM.pdf]

## Description of Additional Supplementary Files

### Legend of Dataset S1:

**Cage trial screening.** Screening results for each generation of the cage trial. F1 to F6 progeny results classified by eye phenotype (DE, dark eyes; ME, mosaic eyes; WE, white eyes) for the multi-generational cage trial. TH (trans-heterozygous, *kmo*<sup>sgRNAs</sup>; *bgcn*-Cas9D).

**Eye phenotype.** Number of individuals with mosaic/white eye phenotype in *kmo*<sup>sgRNAs</sup> and non-*kmo*<sup>sgRNAs</sup> mosquitoes in each generation. *kmo*<sup>sgRNAs</sup> = all progeny that inherited the *kmo*<sup>sgRNAs</sup> element (*kmo*<sup>sgRNAs</sup> only as well as trans-heterozygotes); Non-*kmo*<sup>sgRNAs</sup> = progeny that did not inherit the *kmo*<sup>sgRNAs</sup> element (*bgcn*-Cas9 only and wild type).

**Genotype.** Phenotype frequencies for each generation of the cage trial assay. Phenotype frequencies calculated from the F1-F6 generations (Number of mosquitoes showing a phenotype/total mosquitoes screened). TH: trans-heterozygous; WT: wild type.

**Larvae.** Number of larvae estimated in each experimental cage from F1 to F6.
